# Supplementary material
Source: PubMed Central journal article supplement (PMC6485514)
Supplement: NIHMS62947-supplement-Supporting_Information.pdf [file NIHMS62947-supplement-Supporting_Information.pdf]

## Supporting Information

1  
2  
3  
4  
5  
6  
7  
8  
9  
10  
11  
12  
13  
14  
15  
16  
17  
18

Title: Calcifying species sensitivity distributions for ocean acidification

Authors: Ligia B. Azevedo<sup>1,2</sup>, An M. De Schryver<sup>3,4</sup>, A. Jan Hendriks<sup>2</sup>, Mark A. J. Huijbregts<sup>2</sup>

<sup>1</sup> International Institute for Applied Systems Analysis, Ecosystem Services and Management Program, Schlossplatz 1, A-2361 Laxenburg, Austria

<sup>2</sup> Radboud University of Nijmegen, Department of Environmental Science, Nijmegen, The Netherlands

<sup>3</sup> ETH Zürich, Institute of Environmental Engineering, Zürich, Switzerland

<sup>4</sup> Quantis, Parc Scientifique EPFL, Bâtiment D, 1015 Lausanne, Switzerland

\*Corresponding author:

Ligia B. Azevedo

phone number: +43(0)2236807597

e-mail: azevedol@iiasa.ac.at

Keywords: climate change, pH, potentially affected fraction, effect concentration, marine, acidification

19           This supporting information is composed of four appendices. Appendix S1 shows the  
20 keyword used to complement the data collection with more recent literature. Appendix S2 shows  
21 the conversion from CO<sub>2</sub> partial pressure (pCO<sub>2</sub>) to ocean pH. Appendix S3 describes the  
22 experimental design and pH<sub>50</sub> and pH<sub>10</sub> results of each logistic regression (Table S3.1), the  
23 literature list included by our study (Table S3.2), and the location of each experiment (Figure  
24 S3.1). Appendix S4 shows the result of the influence of temperature and experiment duration on  
25 pH<sub>50</sub> results.

26

27 **Appendix S1** Keyword search in Scopus in September 2014.

28 ABS((acidification\* OR pH OR elevated pCO\*) AND (ocean\* OR marine\*) AND (test\* OR  
29 experiment\* OR lab\*) AND NOT ((marine sediment) OR (\*surfactant OR oil) OR (DMS and  
30 DMSP))) AND (PUBYEAR > 2012)

31

32 **Appendix S2** Conversion of CO<sub>2</sub> partial pressure to pH

33 When CO<sub>2</sub> partial pressure (pCO<sub>2</sub>, μatm) for ocean water was reported instead of pH, we  
34 employed the following conversion equation (Figure S2.1). The conversion was done for 79  
35 experiments (or 21 studies), Table S3.1.

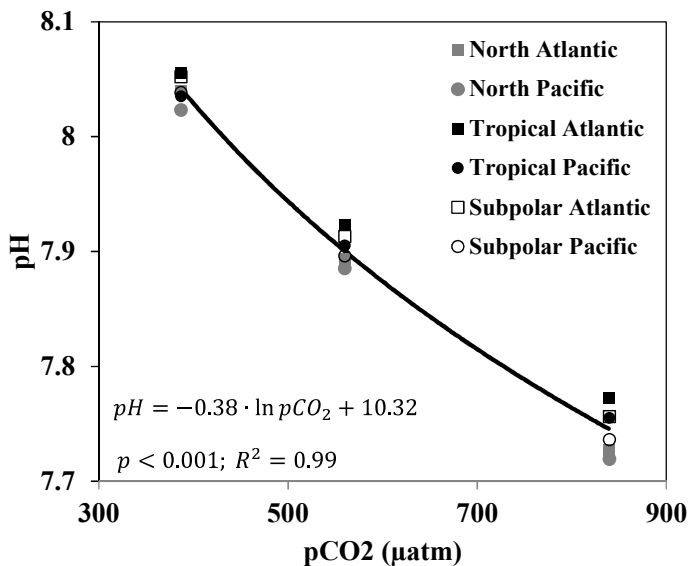

36  
37 **Figure S2.1** Correlation between pCO<sub>2</sub> and pH for different world's oceans based on the work of  
38 Feely et al.<sup>1</sup>.

### Appendix S3 Description of logistic regressions

**Table S3.1** Duration and temperature, the pH range, number of samples, and the pH<sub>50</sub> (95% confidence interval) and pH<sub>10</sub> (derived according to equation 3, main text) of individual logistic regressions for **(a)** growth, **(b)** reproduction, and **(c)** survival of calcifying species. The underlying experimental data for the logistic regressions are listed in Table S3.2 and their locations are illustrated in Figure S3.1. pH<sub>10</sub> was calculated when the logistic regression returned pH<sub>50</sub> and  $\beta$  coefficients were significantly different from zero (otherwise, it is shown as not applicable, N/A).

|                   | Logistic regression ID | Duration (day) | Temperature (°C) | pH range | Samples | pH <sub>50</sub>   | $\beta$            | pH <sub>10</sub> |
|-------------------|------------------------|----------------|------------------|----------|---------|--------------------|--------------------|------------------|
| <b>(a) Growth</b> |                        |                |                  |          |         |                    |                    |                  |
| Annelida          |                        |                |                  |          |         |                    |                    |                  |
|                   |                        |                |                  | 7.48 to  |         |                    |                    |                  |
|                   |                        |                |                  | 8.11     | 4       | 7.67 <sup>£</sup>  | -0.65 <sup>£</sup> | N/A              |
|                   |                        |                |                  | 7.33 to  |         |                    |                    |                  |
|                   |                        |                |                  | 8.11     | 3       | No fit found       |                    | N/A              |
|                   |                        |                |                  | 7.33 to  |         |                    |                    |                  |
|                   |                        |                |                  | 8.11     | 3       | 7.21 <sup>£</sup>  | -0.63 <sup>£</sup> | N/A              |
|                   |                        |                |                  |          |         | 7.60               | -0.37              |                  |
|                   |                        |                |                  | 7.33 to  |         | (7.48 to           | (-0.65 to -        |                  |
|                   |                        |                |                  | 8.11     | 3       | 7.72) <sup>¥</sup> | 0.09)              | 7.95             |
| Arthropoda        |                        |                |                  |          |         |                    |                    |                  |
|                   |                        |                |                  | 7.35 to  |         |                    |                    |                  |
|                   |                        |                |                  | 7.99     | 3       | 1.71 <sup>£</sup>  | -0.06 <sup>£</sup> | N/A              |
|                   |                        |                |                  | 7.35 to  |         |                    |                    |                  |
|                   |                        |                |                  | 7.99     | 3       | 7.77 <sup>£</sup>  | -0.17 <sup>£</sup> | N/A              |
| Bryozoa           |                        |                |                  |          |         |                    |                    |                  |
|                   |                        |                |                  | 7.30 to  |         |                    |                    |                  |
|                   |                        |                |                  | 8.10     | 3       | No fit found       |                    | N/A              |

|                             | Logistic regression ID | Duration (day) | Temperature (°C) | pH range     | Samples | pH <sub>50</sub>                 | $\beta$               | pH <sub>10</sub> |
|-----------------------------|------------------------|----------------|------------------|--------------|---------|----------------------------------|-----------------------|------------------|
|                             | 175                    | 15             | 19               | 7.30 to 8.10 | 3       | 7.30 <sup>£</sup>                | -0.46 <sup>£</sup>    | N/A              |
|                             | 176                    | 15             | 22               | 7.30 to 8.10 | 3       | 7.19 <sup>£</sup>                | -0.07 <sup>£</sup>    | N/A              |
| <i>Electra pilosa</i>       | 194                    | 30             | 16               | 7.33 to 8.11 | 3       | -17.06 <sup>£</sup>              | -3.83 <sup>£</sup>    | N/A              |
| <i>Myriapora truncata</i>   | 188                    | 45             | 18               | 7.43 to 8.06 | 3       | 7.49 <sup>£</sup>                | 0.00 <sup>£</sup>     | N/A              |
| Chlorophyta                 | 189                    | 83             | 18               | 7.43 to 8.06 | 3       | No fit found                     |                       | N/A              |
| <i>Halimeda cylindracea</i> | 332                    | 35             | 28               | 7.40 to 8.10 | 4       | No fit found                     |                       | N/A              |
|                             | 333                    | 35             | 30               | 7.40 to 8.10 | 4       | 7.85 (7.82 to 7.88) <sup>¥</sup> | -0.12 (-0.22 to 0.02) | 7.97             |
|                             | 334                    | 35             | 32               | 7.40 to 8.10 | 4       | 7.80 <sup>£</sup>                | -0.15 <sup>£</sup>    | N/A              |
|                             | 335                    | 35             | 34               | 7.40 to 8.10 | 4       | No fit found                     |                       | N/A              |
| <i>Halimeda incrassata</i>  | 45                     | 60             | 25               | 7.49 to 8.19 | 4       | 7.82 <sup>£</sup>                | -0.15 <sup>£</sup>    | N/A              |
| <i>Halimeda macroloba</i>   | 258                    | 14             | 27               | 7.71 to 8.05 | 3       | No fit found                     |                       | N/A              |
|                             | 259                    | 10             | 27               | 7.71 to 8.01 | 3       | 7.63 <sup>£</sup>                | -0.33 <sup>£</sup>    | N/A              |
|                             | 260                    | 7              | 27               | 7.73 to 7.99 | 3       | 7.83 <sup>£</sup>                | -0.22 <sup>£</sup>    | N/A              |
|                             | 325                    | 35             | 28               | 7.40 to 8.10 | 4       | No fit found                     |                       | N/A              |

|                             | Logistic regression ID | Duration (day) | Temperature (°C) | pH range     | Samples | pH <sub>50</sub>                    | $\beta$                   | pH <sub>10</sub> |
|-----------------------------|------------------------|----------------|------------------|--------------|---------|-------------------------------------|---------------------------|------------------|
|                             | 329                    | 35             | 30               | 7.40 to 8.10 | 4       | 7.38 <sup>£</sup>                   | -0.53 <sup>£</sup>        | N/A              |
|                             | 330                    | 35             | 32               | 7.40 to 8.10 | 4       | No fit found                        |                           | N/A              |
|                             | 331                    | 35             | 34               | 7.40 to 8.10 | 4       | 7.64 <sup>£</sup>                   | -0.23 <sup>£</sup>        | N/A              |
| <i>Halimeda vertebralis</i> | 326                    | 35             | 30               | 7.40 to 8.10 | 4       | No fit found                        |                           | N/A              |
|                             | 327                    | 35             | 32               | 7.40 to 8.10 | 4       | 7.78 <sup>£</sup>                   | -0.16 <sup>£</sup>        | N/A              |
|                             | 328                    | 35             | 34               | 7.40 to 8.10 | 4       | No fit found                        |                           | N/A              |
|                             | 336                    | 35             | 28               | 7.40 to 8.10 | 4       | 7.76 <sup>£</sup>                   | -0.39 <sup>£</sup>        | N/A              |
| Cnidaria                    |                        |                |                  |              |         |                                     |                           |                  |
| <i>Acropora digitifera</i>  | 219                    | 7              | 29.3             | 7.54 to 8.11 | 3       | 7.19 <sup>£</sup>                   | -0.02 <sup>£</sup>        | N/A              |
|                             | 220                    | 7              | 29.3             | 7.57 to 8.16 | 3       | 4.03 <sup>£</sup>                   | -0.71 <sup>£</sup>        | N/A              |
|                             | 221                    | 14             | 29.3             | 7.54 to 8.09 | 3       | No fit found                        |                           | N/A              |
|                             | 222                    | 14             | 29.3             | 7.63 to 8.15 | 3       | 6.89<br>(6.82 to 6.96) <sup>¥</sup> | -0.33<br>(-0.41 to -0.25) | 7.21             |
|                             | 223                    | 35             | 29.3             | 7.38 to 8.13 | 3       | 7.11<br>(7.10 to 7.12) <sup>£</sup> | -0.21<br>(-0.22 to -0.2)  | 7.31             |
|                             | 224                    | 35             | 29.3             | 7.70 to 8.23 | 3       | 7.29 <sup>£</sup>                   | -0.01 <sup>£</sup>        | N/A              |
| <i>Acropora intermedia</i>  | 54                     | 56             | 25.5             | 7.65 to      | 3       | 7.15 <sup>£</sup>                   | -0.41 <sup>£</sup>        | N/A              |

|                           | Logistic regression ID | Duration (day) | Temperature (°C) | pH range                  | Samples | pH <sub>50</sub>                    | $\beta$                     | pH <sub>10</sub> |
|---------------------------|------------------------|----------------|------------------|---------------------------|---------|-------------------------------------|-----------------------------|------------------|
|                           |                        |                |                  | 8.20                      |         |                                     |                             |                  |
|                           | 57                     | 56             | 28.5             | 7.65 to 8.20              | 3       | 6.94<br>(6.93 to 6.95) <sup>¥</sup> | -0.18<br>(-0.18 to 0.18)    | 7.11             |
|                           | 61                     | 56             | 25.5             | 7.65 to 8.20              | 3       | 6.79 <sup>£</sup><br>7.67           | -0.11 <sup>£</sup><br>-0.47 | N/A              |
|                           | 62                     | 56             | 28.5             | 7.65 to 8.20              | 3       | (7.58 to 7.75) <sup>£</sup>         | (-0.67 to 0.27)             | 8.11             |
|                           | 65                     | 56             | 25.5             | 7.65 to 8.20              | 3       | 8.02 <sup>£</sup><br>7.56           | -0.03 <sup>£</sup><br>-0.24 | N/A              |
|                           | 66                     | 56             | 28.5             | 7.65 to 8.20              | 3       | (7.54 to 7.58) <sup>£</sup>         | (-0.28 to 0.21)             | 7.79             |
| <i>Acropora millepora</i> | 195                    | 11             | 26.5             | 7.83 to 8.07              | 3       | 5.55 <sup>£</sup>                   | -1.51 <sup>£</sup>          | N/A              |
|                           | 203                    | 23             | 26.5             | 7.81 to 8.04              | 3       | 8.03 <sup>£</sup>                   | -0.08 <sup>£</sup>          | N/A              |
|                           | 204                    | 23             | 29               | 7.81 to 8.04              | 3       | No fit found                        |                             | N/A              |
|                           | 206                    | 11             | 29               | 7.81 to 8.04              | 3       | 6.62<br>(6.31 to 6.92) <sup>¥</sup> | -1.16<br>(-1.66 to 0.65)    | 7.72             |
|                           | 212                    | 23             | 26.5             | 7.83 to 8.07              | 3       | 7.23 <sup>£</sup>                   | -0.35 <sup>£</sup>          | N/A              |
|                           | 213                    | 23             | 29               | 7.81 to 8.04              | 3       | 7.23 <sup>£</sup><br>7.76           | -0.35 <sup>£</sup><br>-0.36 | N/A              |
| <i>Favia fragum</i>       | 76                     | 14             | 28.5             | 7.58 to 8.14 <sup>□</sup> | 3       | (7.60 to 7.91) <sup>¥</sup>         | (-0.65 to 0.07)             | 8.10             |



|                               | Logistic regression ID | Duration (day) | Temperature (°C) | pH range                  | Samples | pH <sub>50</sub>            | $\beta$                     | pH <sub>10</sub> |
|-------------------------------|------------------------|----------------|------------------|---------------------------|---------|-----------------------------|-----------------------------|------------------|
| <i>Lophelia pertusa</i>       | 90                     | 8              | 9                | 7.77 to 8.03 <sup>□</sup> | 4       | 7.58 <sup>£</sup>           | -0.44 <sup>£</sup>          | N/A              |
|                               | 91                     | 8              | 9                | 7.77 to 8.03 <sup>□</sup> | 4       | 7.29 <sup>£</sup>           | -0.50 <sup>£</sup>          | N/A              |
|                               | 92                     | 8              | 9                | 7.77 to 8.03 <sup>□</sup> | 4       | 7.20 <sup>£</sup>           | -0.57 <sup>£</sup>          | N/A              |
|                               | 128                    | 89             | 12.5             | 7.73 to 8.10 <sup>□</sup> | 4       | No fit found                |                             | N/A              |
|                               | 129                    | 89             | 12.5             | 7.73 to 8.10 <sup>□</sup> | 4       | No fit found                |                             | N/A              |
| <i>Madrepora oculata</i>      | 130                    | 5              | 12.5             | 8.01 to 8.06 <sup>□</sup> | 3       | 6.93 <sup>£</sup>           | -0.69 <sup>£</sup>          | N/A              |
|                               | 126                    | 89             | 12.5             | 7.74 to 8.10 <sup>□</sup> | 4       | No fit found                |                             | N/A              |
|                               | 127                    | 89             | 12.5             | 7.74 to 8.10 <sup>□</sup> | 4       | 6.22 <sup>£</sup>           | -1.92 <sup>£</sup>          | N/A              |
|                               | 131                    | 5              | 12.5             | 7.75 to 8.06 <sup>□</sup> | 3       | 7.38 <sup>£</sup>           | -0.34 <sup>£</sup>          | N/A              |
| <i>Montipora monasteriata</i> | 205                    | 23             | 26.5             | 7.81 to 8.04              | 3       | 7.64 <sup>£</sup><br>6.98   | -0.28 <sup>£</sup><br>-0.37 | N/A              |
|                               | 207                    | 23             | 29               | 7.81 to 8.04              | 3       | (6.95 to 7.02) <sup>¥</sup> | (-0.46 to -0.28)            | 7.33             |
|                               | 214                    | 11             | 26.5             | 7.83 to 8.07              | 3       | 7.22 <sup>£</sup>           | -0.58 <sup>£</sup>          | N/A              |
|                               | 215                    | 11             | 29               | 7.81 to 8.04              | 3       | 7.22 <sup>£</sup>           | -0.38 <sup>£</sup>          | N/A              |
|                               | 216                    | 23             | 26.5             | 7.83 to 8.07              | 3       | 7.26 <sup>£</sup>           | -0.36 <sup>£</sup>          | N/A              |
|                               | 217                    | 23             | 29               | 7.81 to 8.04              | 3       | 7.29 <sup>£</sup>           | -0.37 <sup>£</sup>          | N/A              |

|                               | Logistic regression ID | Duration (day) | Temperature (°C) | pH range          | Samples | pH <sub>50</sub>                 | $\beta$                | pH <sub>10</sub> |
|-------------------------------|------------------------|----------------|------------------|-------------------|---------|----------------------------------|------------------------|------------------|
|                               |                        |                |                  | 8.04              |         |                                  |                        |                  |
| <i>Oculina arbuscula</i>      | 38                     | 60             | 25               | 7.48 to 8.11      | 4       | 7.03 (6.74 to 7.33) <sup>¥</sup> | -0.81 (-1.47 to -0.15) | 7.81             |
| <i>Pocillopora damicornis</i> | 196                    | 11             | 29               | 7.81 to 8.04      | 3       | 7.61 (7.60 to 7.63) <sup>€</sup> | -0.3 (-0.33 to -0.26)  | 7.89             |
|                               | 197                    | 23             | 26.5             | 7.83 to 8.07      | 3       | 7.31 <sup>£</sup>                | -0.46 <sup>£</sup>     | N/A              |
|                               | 198                    | 23             | 29               | 7.81 to 8.04      | 3       | 7.48 <sup>£</sup>                | -0.41 <sup>£</sup>     | N/A              |
|                               | 208                    | 23             | 26.5             | 7.81 to 8.04      | 3       | 7.04 (6.99 to 7.09) <sup>¥</sup> | -0.58 (-0.7 to -0.46)  | 7.59             |
|                               | 209                    | 23             | 29               | 7.81 to 8.04      | 3       | 6.64 <sup>£</sup>                | -0.42 <sup>£</sup>     | N/A              |
|                               | 218                    | 11             | 26.5             | 7.83 to 8.07      | 3       | 7.10 <sup>£</sup>                | -0.59 <sup>£</sup>     | N/A              |
|                               | 257                    | 14             | 27               | 7.71 to 8.05      | 3       | No fit found                     |                        | N/A              |
|                               | 261                    | 10             | 27               | 7.71 to 8.01      | 3       | 7.63 <sup>£</sup>                | -0.26 <sup>£</sup>     | N/A              |
|                               | 262                    | 7              | 27               | 7.73 to 7.99      | 3       | 6.99 <sup>£</sup>                | -0.73 <sup>£</sup>     | N/A              |
|                               | 263                    | 14             | 27               | 7.85 7.71 to 8.05 | 3       | 7.85 (7.84 to 7.86) <sup>€</sup> | -0.02 (-0.04 to 0)     | 7.87             |
|                               | 264                    | 10             | 27               | 7.71 to 8.01      | 3       | 7.63 <sup>£</sup>                | -0.33 <sup>£</sup>     | N/A              |
|                               | 265                    | 7              | 27               | 7.73 to 8.01      | 3       | 7.86 <sup>£</sup>                | -0.28 <sup>£</sup>     | N/A              |



|                                   | Logistic regression ID | Duration (day) | Temperature (°C) | pH range                  | Samples | pH <sub>50</sub>                    | $\beta$                     | pH <sub>10</sub> |
|-----------------------------------|------------------------|----------------|------------------|---------------------------|---------|-------------------------------------|-----------------------------|------------------|
| <i>Amphiura filiformis</i>        | 1                      | 40             | 14.5             | 6.80 to 8.00              | 4       | 4.95 <sup>£</sup><br>7.06           | -2.10 <sup>£</sup><br>-0.78 | N/A              |
| <i>Arbacia punctulata</i>         | 36                     | 60             | 25               | 7.36 to 8.04              | 4       | (6.92 to 7.20) <sup>¥</sup>         | (-1.1 to -0.46)             | 7.81             |
| <i>Asterias rubens</i>            | 181                    | 70             | 12.9             | 7.36 to 8.06 <sup>□</sup> | 3       | 7.25 <sup>£</sup>                   | -0.04 <sup>£</sup>          | N/A              |
| <i>Centrostephanus rodgersii</i>  | 85                     | 5              | 0                | 7.60 to 8.01              | 3       | 7.50 <sup>£</sup><br>7.82           | -0.02 <sup>£</sup><br>-0.14 | N/A              |
| <i>Echinometra mathaei</i>        | 12                     | 3              | 24               | 7.13 to 8.11              | 5       | (7.79 to 7.85) <sup>¥</sup>         | (-0.21 to -0.08)            | 7.96             |
| <i>Eucidaris tribuloides</i>      | 44                     | 60             | 25               | 7.36 to 8.04              | 4       | 7.20 <sup>£</sup>                   | -0.73 <sup>£</sup>          | N/A              |
| <i>Heliocidaris erythrogramma</i> | 236                    | 14             | 21               | 7.40 to 8.20              | 4       | 7.94 <sup>£</sup>                   | -0.11 <sup>£</sup>          | N/A              |
|                                   | 237                    | 14             | 23               | 7.40 to 8.20              | 4       | 7.83 <sup>£</sup>                   | -0.08 <sup>£</sup>          | N/A              |
|                                   | 238                    | 14             | 25               | 7.40 to 8.20              | 4       | 7.85 <sup>£</sup>                   | -0.17 <sup>£</sup>          | N/A              |
|                                   | 239                    | 14             | 21               | 7.60 to 8.20              | 3       | 7.26 <sup>£</sup>                   | -0.02 <sup>£</sup>          | N/A              |
|                                   | 240                    | 14             | 21               | 7.40 to 8.20              | 3       | No fit found                        |                             | N/A              |
| <i>Hemicentrotus pulcherrimus</i> | 14                     | 3              | 14               | 7.02 to 7.98              | 5       | 6.31 <sup>£</sup><br>6.26           | -2.58 <sup>£</sup><br>-0.30 | N/A              |
|                                   | 136                    | 3              | 12.5             | 7.00 to 8.20              | 6       | (6.07 to 6.46) <sup>¥</sup><br>7.54 | (-0.54 to -0.07)            | 6.55<br>7.83     |

|                                          | Logistic regression ID | Duration (day) | Temperature (°C) | pH range                  | Samples | pH <sub>50</sub>                    | β                           | pH <sub>10</sub> |
|------------------------------------------|------------------------|----------------|------------------|---------------------------|---------|-------------------------------------|-----------------------------|------------------|
|                                          |                        |                |                  | 8.10                      |         | (7.43 to 7.65) <sup>‡</sup>         | (-0.52 to -0.07)            |                  |
|                                          | 137                    | 3              | 12.5             | 7.00 to 8.10              | 6       | 7.63 <sup>£</sup>                   | -0.31 <sup>£</sup>          | N/A              |
|                                          | 138                    | 3              | 12.5             | 7.00 to 8.10              | 6       | 7.57 <sup>£</sup><br>7.73           | -0.36 <sup>£</sup><br>-0.23 | N/A              |
|                                          | 139                    | 3              | 12.5             | 7.00 to 8.10              | 6       | (7.69 to 7.78) <sup>£</sup>         | (-0.32 to -0.14)            | 7.95             |
| <i>Strongylocentrotus droebachiensis</i> | 86                     | 29             | 9                | 6.50 to 8.01              | 25      | 7.56 <sup>£</sup>                   | -0.29 <sup>£</sup>          | N/A              |
| <i>Strongylocentrotus purpuratus</i>     | 140                    | 6              | 15.5             | 7.52 to 8.06 <sup>□</sup> | 3       | 6.92 <sup>£</sup>                   | -0.71 <sup>£</sup>          | N/A              |
|                                          | 141                    | 6              | 15.5             | 7.52 to 8.06 <sup>□</sup> | 3       | No fit found                        |                             | N/A              |
|                                          | 142                    | 6              | 15.5             | 7.52 to 8.06 <sup>□</sup> | 3       | 7.44 <sup>£</sup><br>7.01           | -0.26 <sup>£</sup><br>-0.31 | N/A              |
|                                          | 143                    | 6              | 15.5             | 7.52 to 8.06 <sup>□</sup> | 3       | (6.94 to 7.07) <sup>£</sup><br>7.02 | (-0.45 to -0.18)            | 7.31             |
|                                          | 144                    | 6              | 15.5             | 7.52 to 8.06 <sup>□</sup> | 3       | (6.97 to 7.06) <sup>£</sup>         | (-0.28 to -0.07)            | 7.19             |
|                                          | 145                    | 6              | 15.5             | 7.52 to 8.06 <sup>□</sup> | 3       | 7.74 <sup>£</sup>                   | -0.03 <sup>£</sup>          | N/A              |
|                                          | 146                    | 6              | 15.5             | 7.52 to 8.06 <sup>□</sup> | 3       | 7.76 <sup>£</sup>                   | -0.01 <sup>£</sup>          | N/A              |
|                                          | 147                    | 6              | 15.5             | 7.52 to 8.06 <sup>□</sup> | 3       | 7.97 <sup>£</sup>                   | -0.01 <sup>£</sup>          | N/A              |
|                                          | 244                    | 3              | 15.6             | 7.52 to                   | 3       | 6.42 <sup>£</sup>                   | -2.46 <sup>£</sup>          | N/A              |

|                                  | Logistic regression ID | Duration (day) | Temperature (°C) | pH range                  | Samples | pH <sub>50</sub>                   | β                           | pH <sub>10</sub> |
|----------------------------------|------------------------|----------------|------------------|---------------------------|---------|------------------------------------|-----------------------------|------------------|
|                                  |                        |                |                  | 8.06                      |         |                                    |                             |                  |
|                                  | 245                    | 6              | 15.6             | 7.52 to 8.06              | 3       | 6.84 <sup>£</sup><br>6.97          | -0.42 <sup>£</sup><br>-0.07 | N/A              |
|                                  | 246                    | 3              | 15.6             | 7.52 to 8.06              | 3       | (6.96 to 6.98) <sup>¥</sup>        | (-0.08 to -0.06)            | 7.03             |
|                                  | 247                    | 6              | 15.6             | 7.52 to 8.06              | 3       | 5.67 <sup>£</sup>                  | -1.05 <sup>£</sup>          | N/A              |
|                                  | 248                    | 3              | 15.6             | 7.52 to 8.06              | 3       | 6.60 <sup>£</sup>                  | -0.97 <sup>£</sup><br>-0.05 | N/A              |
|                                  | 249                    | 6              | 15.6             | 7.52 to 8.06              | 3       | 7.31<br>(7.3 to 7.32) <sup>€</sup> | (-0.08 to -0.01)            | 7.35             |
|                                  | 250                    | 3              | 15.6             | 7.52 to 8.06              | 3       | No fit found                       |                             | N/A              |
|                                  | 251                    | 6              | 15.6             | 7.52 to 8.06              | 3       | No fit found                       |                             | N/A              |
| Foraminifera                     |                        |                |                  |                           |         |                                    |                             |                  |
| <i>Amphisorus hemprichii</i>     | 95                     | 84             | 27.5             | 7.76 to 8.17 <sup>□</sup> | 5       | 7.49 <sup>£</sup>                  | -0.52 <sup>£</sup>          | N/A              |
|                                  | 96                     | 84             | 27.5             | 7.76 to 8.17 <sup>□</sup> | 5       | 7.6 <sup>£</sup>                   | -0.38 <sup>£</sup>          | N/A              |
|                                  | 97                     | 84             | 27.5             | 7.76 to 8.17 <sup>□</sup> | 5       | 7.9 <sup>£</sup>                   | 0.00 <sup>£</sup>           | N/A              |
|                                  | 105                    | 84             | 27.5             | 7.76 to 8.17 <sup>□</sup> | 5       | 7.58 <sup>£</sup>                  | -0.01 <sup>£</sup>          | N/A              |
| <i>Amphistegina radiata</i>      | 233                    | 40             | 27               | 7.58 to 8.10              | 4       | 7.82 <sup>£</sup>                  | -0.14 <sup>£</sup>          | N/A              |
| <i>Baculogypsina sphaerulata</i> | 94                     | 84             | 27.5             | 7.76 to 8.17 <sup>□</sup> | 5       | 7.55 <sup>£</sup>                  | -0.02 <sup>£</sup>          | N/A              |

|                                              | Logistic regression ID | Duration (day) | Temperature (°C) | pH range                  | Samples | pH <sub>50</sub>                    | $\beta$                   | pH <sub>10</sub> |
|----------------------------------------------|------------------------|----------------|------------------|---------------------------|---------|-------------------------------------|---------------------------|------------------|
|                                              | 98                     | 84             | 27.5             | 7.76 to 8.17 <sup>□</sup> | 5       | 7.64<br>(7.63 to 7.65) <sup>¥</sup> | -0.04<br>(-0.08 to 0.00)  | 7.68             |
|                                              | 99                     | 84             | 27.5             | 7.76 to 8.17 <sup>□</sup> | 5       | 7.63 <sup>£</sup>                   | -0.02 <sup>£</sup>        | N/A              |
|                                              | 100                    | 84             | 27.5             | 7.76 to 8.17 <sup>□</sup> | 5       | 7.90 <sup>£</sup>                   | -0.02 <sup>£</sup>        | N/A              |
| <i>Calcarina gaudichaudii</i>                | 101                    | 84             | 27.5             | 7.76 to 8.17 <sup>□</sup> | 5       | 7.57 <sup>£</sup>                   | -0.01 <sup>£</sup>        | N/A              |
|                                              | 102                    | 84             | 27.5             | 7.76 to 8.17 <sup>□</sup> | 5       | 7.57 <sup>£</sup>                   | -0.01 <sup>£</sup>        | N/A              |
|                                              | 103                    | 84             | 27.5             | 7.76 to 8.17 <sup>□</sup> | 5       | 7.49 <sup>£</sup>                   | -0.03 <sup>£</sup>        | N/A              |
|                                              | 104                    | 84             | 27.5             | 7.76 to 8.17 <sup>□</sup> | 5       | 7.62 <sup>£</sup>                   | 0.00 <sup>£</sup>         | N/A              |
| <i>Heterostegina depressa</i>                | 234                    | 40             | 27               | 7.58 to 8.10              | 4       | 7.76<br>(7.74 to 7.78) <sup>¥</sup> | -0.12<br>(-0.16 to -0.08) | 7.87             |
| <i>Marginopora vertebralis</i><br>Haptophyta | 235                    | 40             | 27               | 7.58 to 8.10              | 4       | 7.76 <sup>£</sup>                   | -0.23 <sup>£</sup>        | N/A              |
| <i>Emiliana huxleyi</i>                      | 2                      | not clear      | 19               | 7.79 to 8.15              | 5       | 7.72<br>(7.66 to 7.78) <sup>¥</sup> | -0.20<br>(-0.31 to -0.09) | 7.91             |
|                                              | 73                     | 57             | 13               | 7.75 to 8.18              | 3       | 7.92 <sup>£</sup>                   | -0.23 <sup>£</sup>        | N/A              |
|                                              | 74                     | 57             | 18               | 7.75 to 8.18              | 3       | 8.01 <sup>£</sup>                   | -0.02 <sup>£</sup>        | N/A              |
|                                              | 297                    | 320            | not clear        | 7.40 to 8.04 <sup>□</sup> | 3       | No fit found                        |                           | N/A              |

|                              | Logistic regression ID | Duration (day) | Temperature (°C) | pH range                  | Samples | pH <sub>50</sub>  | $\beta$            | pH <sub>10</sub> |
|------------------------------|------------------------|----------------|------------------|---------------------------|---------|-------------------|--------------------|------------------|
| Heterokontophyta             | 298                    | 320            | not clear        | 7.40 to 8.04 <sup>□</sup> | 3       | 7.67 <sup>£</sup> | -0.27 <sup>£</sup> | N/A              |
| <i>Turbinaria reniformis</i> | 199                    | 11             | 26.5             | 7.83 to 8.07              | 3       | 7.41 <sup>£</sup> | -0.01 <sup>£</sup> | N/A              |
|                              | 200                    | 11             | 29               | 7.81 to 8.04              | 3       | No fit found      |                    | N/A              |
|                              | 201                    | 23             | 26.5             | 7.83 to 8.07              | 3       | No fit found      |                    | N/A              |
|                              | 202                    | 23             | 29               | 7.81 to 8.04              | 3       | No fit found      |                    | N/A              |
|                              | 210                    | 23             | 26.5             | 7.81 to 8.04              | 3       | 6.70 <sup>£</sup> | -0.67 <sup>£</sup> | N/A              |
| Mollusca                     | 211                    | 23             | 29               | 7.81 to 8.04              | 3       | 7.13 <sup>£</sup> | -0.44 <sup>£</sup> | N/A              |
| <i>Argonauta nodosa</i>      | 341                    | 14             | 19               | 7.20 to 8.10              | 5       | No fit found      |                    | N/A              |
|                              | 342                    | 14             | 24               | 7.20 to 8.10              | 5       | No fit found      |                    | N/A              |
| <i>Argopecten irradians</i>  | 18                     | 15             | 24               | 7.48 to 8.08              | 3       | 6.35 <sup>£</sup> | -0.47 <sup>£</sup> | N/A              |
|                              | 41                     | 60             | 25               | 7.45 to 8.15              | 4       | 7.57 <sup>£</sup> | -0.73 <sup>£</sup> | N/A              |
|                              | 231                    | 20             | 24               | 7.80 to 8.21              | 3       | 7.69 <sup>£</sup> | -0.13 <sup>£</sup> | N/A              |
|                              | 232                    | 20             | 28               | 7.80 to 8.21              | 3       | 7.68 <sup>£</sup> | -0.23 <sup>£</sup> | N/A              |
| <i>Chlamys farreri</i>       | 299                    | <1             | 16               | 6.96 to 8.08              | 5       | 7.83 <sup>£</sup> | 0.00 <sup>£</sup>  | N/A              |



|                              | Logistic regression ID | Duration (day) | Temperature (°C) | pH range                  | Samples | pH <sub>50</sub>            | β                           | pH <sub>10</sub> |
|------------------------------|------------------------|----------------|------------------|---------------------------|---------|-----------------------------|-----------------------------|------------------|
| <i>Crassostrea gigas</i>     | 34                     | <1             | 20               | 7.55 to 8.07              | 20      | 7.30 <sup>£</sup><br>7.67   | -0.84 <sup>£</sup><br>-0.04 | N/A              |
|                              | 107                    | 3              | 18.9             | 7.41 to 8.03              | 5       | (7.65 to 7.69) <sup>¥</sup> | (-0.07 to -0.01)            | 7.71             |
|                              | 108                    | 3              | 18.9             | 7.41 to 8.03              | 4       | 7.65 <sup>£</sup>           | 0.00 <sup>£</sup>           | N/A              |
|                              | 339                    | 1              | 0                | 7.64 to 7.97              | 3       | No fit found                |                             | N/A              |
|                              | 340                    | 3              | 0                | 7.64 to 7.97              | 3       | No fit found                |                             | N/A              |
| <i>Crassostrea virginica</i> | 20                     | 20             | 24               | 7.48 to 8.08              | 3       | 6.37 <sup>£</sup>           | -0.14 <sup>£</sup>          | N/A              |
|                              | 42                     | 60             | 25               | 7.45 to 8.15              | 4       | 7.57 <sup>£</sup><br>7.32   | -0.74 <sup>£</sup><br>-0.30 | N/A              |
| <i>Crepidula fornicata</i>   | 43                     | 60             | 25               | 7.42 to 8.09              | 4       | (7.21 to 7.44) <sup>¥</sup> | (-0.50 to -0.09)            | 7.61             |
| <i>Limacina helicina</i>     | 123                    | 29             | 4.25             | 7.66 to 8.28 <sup>□</sup> | 4       | 7.57 <sup>£</sup>           | -0.04 <sup>£</sup>          | N/A              |
|                              | 125                    | 7              | 2                | 7.74 to 8.10 <sup>□</sup> | 3       | 7.40 <sup>£</sup>           | -0.35 <sup>£</sup>          | N/A              |
|                              | 345                    | <1             | 0.5              | 7.63 to 8.17 <sup>□</sup> | 5       | 7.62 <sup>£</sup>           | -0.02 <sup>£</sup>          | N/A              |
|                              | 346                    | <1             | 3.9              | 7.61 to 8.18 <sup>□</sup> | 5       | 7.38 <sup>£</sup>           | -0.03 <sup>£</sup>          | N/A              |
| <i>Littorina littorea</i>    | 47                     | 60             | 25               | 7.42 to 8.09              | 4       | 6.99 <sup>£</sup>           | -1.05 <sup>£</sup>          | N/A              |
| <i>Mercenaria mercenaria</i> | 23                     | 18             | 24               | 7.48 to 8.08              | 3       | 6.41<br>(6.10 to            | -0.82<br>(-1.51 to -        | 7.20             |

|                       | Logistic regression ID | Duration (day) | Temperature (°C) | pH range     | Samples | pH <sub>50</sub>                | $\beta$            | pH <sub>10</sub> |
|-----------------------|------------------------|----------------|------------------|--------------|---------|---------------------------------|--------------------|------------------|
|                       |                        |                |                  |              |         | 6.72) <sup>¥</sup>              | 0.13)              |                  |
|                       |                        |                |                  |              |         |                                 | -0.48              |                  |
|                       | 48                     | 60             | 25               | 7.45 to 8.15 | 4       | 7.50 (7.40 to 7.6) <sup>€</sup> | (-0.65 to -0.31)   | 7.96             |
|                       | 229                    | 20             | 24               | 7.80 to 8.21 | 3       | No fit found                    |                    | N/A              |
|                       |                        |                |                  |              |         | 7.74                            | -0.20              |                  |
|                       | 230                    | 20             | 28               | 7.80 to 8.21 | 3       | (7.70 to 7.79) <sup>€</sup>     | (-0.31 to -0.09)   | 7.94             |
|                       |                        |                |                  |              |         | 6.83                            | -0.57              |                  |
|                       |                        |                |                  |              |         | (6.73 to 6.92) <sup>¥</sup>     | (-0.74 to -0.4)    |                  |
| <i>Mya arenaria</i>   | 37                     | 60             | 25               | 7.45 to 8.15 | 4       | 6.92) <sup>¥</sup>              |                    | 7.37             |
|                       |                        |                |                  |              |         |                                 |                    |                  |
| <i>Mytilus edulis</i> | 26                     | 44             | 20               | 6.70 to 8.10 | 5       | 7.43 <sup>£</sup>               | -0.44 <sup>£</sup> | N/A              |
|                       |                        |                |                  |              |         |                                 |                    |                  |
|                       | 27                     | 44             | 20               | 6.70 to 8.10 | 5       | 6.39 <sup>£</sup>               | -1.55 <sup>£</sup> | N/A              |
|                       |                        |                |                  |              |         |                                 |                    |                  |
|                       |                        |                |                  |              |         | 7.18                            | -0.35              |                  |
|                       | 35                     | <1             | 20               | 7.46 to 8.13 | 30      | (7.16 to 7.20) <sup>¥</sup>     | (-0.39 to -0.32)   | 7.52             |
|                       |                        |                |                  |              |         |                                 |                    |                  |
|                       | 148                    | 49             | 5                | 7.15 to 8.01 | 4       | No fit found                    |                    | N/A              |
|                       |                        |                |                  |              |         |                                 |                    |                  |
|                       | 149                    | 49             | 5                | 7.19 to 8.01 | 4       | 7.97 <sup>£</sup>               | -0.01 <sup>£</sup> | N/A              |
|                       |                        |                |                  |              |         |                                 |                    |                  |
|                       | 150                    | 49             | 5                | 7.15 to 8.01 | 4       | No fit found                    |                    | N/A              |
|                       |                        |                |                  |              |         |                                 |                    |                  |
|                       | 151                    | 49             | 5                | 7.19 to 8.01 | 4       | 7.43 <sup>£</sup>               | -0.27 <sup>£</sup> | N/A              |
|                       |                        |                |                  |              |         |                                 |                    |                  |
|                       | 152                    | 49             | 5                | 7.15 to 8.01 | 4       | 7.78 <sup>£</sup>               | -0.48 <sup>£</sup> | N/A              |
|                       |                        |                |                  |              |         |                                 |                    |                  |
|                       | 153                    | 49             | 5                | 7.19 to 8.01 | 4       | 7.42 <sup>£</sup>               | -0.56 <sup>£</sup> | N/A              |

|                           | Logistic regression ID | Duration (day) | Temperature (°C) | pH range                  | Samples | pH <sub>50</sub>            | $\beta$                     | pH <sub>10</sub> |
|---------------------------|------------------------|----------------|------------------|---------------------------|---------|-----------------------------|-----------------------------|------------------|
|                           |                        |                |                  | 8.01                      |         |                             |                             |                  |
|                           | 182                    | 70             | 12.9             | 7.36 to 8.06 <sup>□</sup> | 3       | 7.21 <sup>£</sup>           | -0.07 <sup>£</sup>          | N/A              |
| <i>Ostrea lurida</i>      | 285                    | 9              | 20               | 7.80 to 8.00              | 3       | 7.22 <sup>£</sup><br>7.53   | -0.58 <sup>£</sup><br>-0.30 | N/A              |
|                           | 286                    | 16             | 20               | 7.80 to 8.00              | 3       | (7.43 to 7.63) <sup>¥</sup> | (-0.45 to -0.16)            | 7.82             |
|                           | 287                    | 61             | 20               | 7.80 to 8.00              | 3       | No fit found                |                             | N/A              |
| <i>Sepia officinalis</i>  | 109                    | 56             | 15               | 7.28 to 7.96              | 3       | 7.38 <sup>£</sup><br>7.77   | -0.85 <sup>£</sup><br>-0.04 | N/A              |
|                           | 110                    | 56             | 15               | 7.28 to 7.96              | 3       | (7.76 to 7.78) <sup>¥</sup> | (-0.08 to 0.00)             | 7.81             |
|                           | 111                    | 56             | 15               | 7.28 to 7.96              | 3       | 7.27 <sup>£</sup>           | -0.70 <sup>£</sup>          | N/A              |
|                           | 112                    | 56             | 15               | 7.28 to 7.96              | 3       | No fit found                |                             | N/A              |
| <i>Strombus alatus</i>    | 39                     | 60             | 25               | 7.42 to 8.09              | 4       | 7.72 <sup>£</sup>           | -0.32 <sup>£</sup>          | N/A              |
| <i>Turbo cornutus</i>     | 323                    | 3              | 0                | 7.40 to 8.00              | 5       | 7.81 <sup>£</sup>           | -0.01 <sup>£</sup>          | N/A              |
|                           | 324                    | 3              | 0                | 7.52 to 7.98              | 5       | No fit found                |                             | N/A              |
| <i>Urosalpinx cinerea</i> | 40                     | 60             | 25               | 7.42 to 8.09              | 4       | 7.83 <sup>£</sup>           | -0.31 <sup>£</sup>          | N/A              |
| Rhodophyta                |                        |                |                  |                           |         |                             |                             | N/A              |
| <i>Corallina elongata</i> | 242                    | not clear      | 24.3             | 7.70 to 8.09              | 4       | 7.26 <sup>£</sup>           | -0.01 <sup>£</sup>          | N/A              |

|                                   | Logistic regression ID | Duration (day) | Temperature (°C) | pH range                  | Samples | pH <sub>50</sub>  | $\beta$            | pH <sub>10</sub> |
|-----------------------------------|------------------------|----------------|------------------|---------------------------|---------|-------------------|--------------------|------------------|
|                                   | 243                    | not clear      | 24.3             | 7.70 to 8.09              | 4       | No fit found      |                    | N/A              |
|                                   | 270                    | 30             | 18               | 7.72 to 8.09              | 4       | 7.43 <sup>£</sup> | -0.01 <sup>£</sup> | N/A              |
|                                   | 271                    | 30             | 18               | 7.72 to 8.09              | 4       | 8.00 <sup>£</sup> | -0.01 <sup>£</sup> | N/A              |
| <i>Lithothamnion corallioides</i> | 156                    | 93             | 10               | 7.68 to 8.09 <sup>□</sup> | 4       | 5.45 <sup>£</sup> | -2.05 <sup>£</sup> | N/A              |
|                                   | 157                    | 93             | 16               | 7.68 to 8.07 <sup>□</sup> | 4       | 8.46 <sup>£</sup> | 0.16 <sup>£</sup>  | N/A              |
|                                   | 158                    | 93             | 19               | 7.72 to 8.02 <sup>□</sup> | 4       | No fit found      |                    | N/A              |
|                                   | 159                    | 93             | 10               | 7.68 to 8.09 <sup>□</sup> | 4       | 7.39 <sup>£</sup> | -0.79 <sup>£</sup> | N/A              |
|                                   | 160                    | 93             | 16               | 7.68 to 8.07 <sup>□</sup> | 4       | 7.34 <sup>£</sup> | 0.00 <sup>£</sup>  | N/A              |
|                                   | 161                    | 93             | 19               | 7.72 to 8.02 <sup>□</sup> | 4       | 7.55 <sup>£</sup> | -0.57 <sup>£</sup> | N/A              |
|                                   | 162                    | 93             | 10               | 7.68 to 8.09 <sup>□</sup> | 4       | No fit found      |                    | N/A              |
|                                   | 163                    | 93             | 16               | 7.68 to 8.07 <sup>□</sup> | 4       | 7.63 <sup>£</sup> | -0.24 <sup>£</sup> | N/A              |
|                                   | 164                    | 93             | 19               | 7.72 to 8.02 <sup>□</sup> | 4       | 7.34 <sup>£</sup> | -0.28 <sup>£</sup> | N/A              |
| <i>Lithothamnion glaciale</i>     | 180                    | 30             | 7                | 7.72 to 8.03 <sup>□</sup> | 4       | No fit found      |                    | N/A              |
|                                   | 183                    | 90             | 7                | 7.72 to 8.03              | 4       | 7.44 <sup>£</sup> | -0.01 <sup>£</sup> | N/A              |
|                                   | 184                    | 300            | 7                | 7.72 to 8.03              | 4       | 7.52 <sup>£</sup> | -0.02 <sup>£</sup> | N/A              |



|                             | Logistic regression ID | Duration (day) | Temperature (°C) | pH range                  | Samples | pH <sub>50</sub>            | $\beta$            | pH <sub>10</sub> |
|-----------------------------|------------------------|----------------|------------------|---------------------------|---------|-----------------------------|--------------------|------------------|
| <i>Acartia erythraea</i>    | 29                     | 8              | 27               | 6.91 to 8.15              | 3       | 7.57 <sup>£</sup>           | -0.25 <sup>£</sup> | N/A              |
|                             | 30                     | 8              | 27               | 6.82 to 8.09              | 4       | 7.59 <sup>£</sup>           | -0.32 <sup>£</sup> | N/A              |
| <i>Acartia steueri</i>      | 32                     | 6              | 27               | 6.93 to 8.16              | 3       | 7.49 <sup>£</sup>           | -0.30 <sup>£</sup> | N/A              |
|                             |                        |                |                  |                           |         | 7.34                        | -0.25              |                  |
| <i>Calanus finmarchicus</i> | 171                    | 7              | 9.2              | 6.89 to 8.23              | 4       | (7.31 to 7.37) <sup>§</sup> | (-0.32 to -0.17)   | 7.58             |
|                             |                        |                |                  |                           |         | 7.03                        | -0.30              |                  |
| <i>Euphausia superba</i>    | 113                    | 10             | 0.5              | 7.43 to 8.06 <sup>□</sup> | 3       | (6.98 to 7.07) <sup>§</sup> | (-0.36 to -0.25)   | 7.32             |
|                             |                        |                |                  |                           |         | 7.29                        | -0.31              |                  |
|                             | 114                    | 10             | 0.5              | 7.43 to 8.06 <sup>□</sup> | 3       | (7.25 to 7.33) <sup>£</sup> | (-0.39 to -0.24)   | 7.59             |
|                             |                        |                |                  |                           |         | 7.18                        | -0.34              |                  |
|                             | 115                    | 10             | 0.5              | 7.43 to 8.06 <sup>□</sup> | 3       | (7.01 to 7.34) <sup>£</sup> | (-0.54 to -0.14)   | 7.5              |
|                             |                        |                |                  |                           |         | 7.32                        | -0.27              |                  |
|                             | 116                    | 10             | 0.5              | 7.43 to 8.06 <sup>□</sup> | 3       | (7.29 to 7.34) <sup>£</sup> | (-0.32 to -0.22)   | 7.58             |
| Bryozoa                     |                        |                |                  |                           |         |                             |                    |                  |
| <i>Celleporella hyalina</i> | 177                    | 15             | 15               | 7.30 to 8.10              | 3       | 7.27 <sup>£</sup>           | -0.40 <sup>£</sup> | N/A              |
|                             |                        |                |                  |                           |         | 7.28                        | -0.31              |                  |
|                             | 178                    | 15             | 19               | 7.30 to 8.10              | 3       | (7.25 to 7.31) <sup>£</sup> | (-0.36 to -0.25)   | 7.57             |
|                             |                        |                |                  |                           |         | 7.16                        | -0.32              |                  |
|                             | 179                    | 15             | 22               | 7.30 to 8.10              | 3       | (6.98 to 7.34) <sup>§</sup> | (-0.52 to -0.12)   | 7.46             |

|                                   | Logistic regression ID | Duration (day) | Temperature (°C) | pH range                  | Samples | pH <sub>50</sub>                 | $\beta$                     | pH <sub>10</sub> |
|-----------------------------------|------------------------|----------------|------------------|---------------------------|---------|----------------------------------|-----------------------------|------------------|
| Cnidaria                          |                        |                |                  |                           |         |                                  |                             |                  |
| <i>Acropora palmata</i>           | 132                    | <1             | 28               | 7.72 to 7.99 <sup>□</sup> | 3       | 7.22 (7.13 to 7.30) <sup>£</sup> | -0.30 (-0.41 to -0.19)      | 7.5              |
|                                   | 133                    | <1             | 28               | 7.72 to 7.99 <sup>□</sup> | 3       | 7.26 <sup>£</sup><br>7.19        | -0.40 <sup>£</sup><br>-0.37 | N/A              |
|                                   | 134                    | <1             | 28               | 7.72 to 7.99 <sup>□</sup> | 3       | (6.97 to 7.42) <sup>§</sup>      | (-0.67 to -0.07)            | 7.55             |
|                                   | 135                    | <1             | 28               | 7.72 to 7.99 <sup>□</sup> | 3       | 7.11 <sup>£</sup><br>7.06        | -0.31 <sup>£</sup><br>-0.30 | N/A              |
| <i>Balanophyllia elegans</i>      | 69                     | 93             | 0                | 7.60 to 8.00              | 3       | (6.94 to 7.18) <sup>§</sup>      | (-0.40 to -0.20)            | 7.34             |
|                                   | 70                     | 93             | 0                | 7.60 to 8.00              | 3       | 7.67 <sup>£</sup>                | -0.27 <sup>£</sup>          | N/A              |
| Echinodermata                     |                        |                |                  |                           |         |                                  |                             |                  |
| <i>Echinometra mathaei</i>        | 11                     | <1             | 24               | 6.78 to 8.11              | 6       | 7.66 <sup>£</sup>                | -0.19 <sup>£</sup>          | N/A              |
|                                   | 24                     | <1             | 24               | 6.80 to 8.10              | 6       | 7.51 <sup>£</sup><br>7.48        | -0.43 <sup>£</sup><br>-0.29 | N/A              |
|                                   | 25                     | <1             | 24               | 6.80 to 8.10              | 6       | (7.39 to 7.56) <sup>§</sup>      | (-0.53 to -0.05)            | 7.76             |
| <i>Heliocidaris erythrogramma</i> | 8                      | <1             | 22               | 7.60 to 8.17              | 3       | 6.96 <sup>£</sup>                | -0.99 <sup>£</sup>          | N/A              |
|                                   | 9                      | <1             | 24               | 7.60 to 8.17              | 3       | 7.19 <sup>£</sup>                | -0.01 <sup>£</sup>          | N/A              |
|                                   | 10                     | <1             | 26               | 7.60 to 8.17              | 3       | 7.24 <sup>£</sup>                | -0.03 <sup>£</sup>          | N/A              |

|                                   | Logistic regression ID | Duration (day) | Temperature (°C) | pH range     | Samples | pH <sub>50</sub>   | $\beta$            | pH <sub>10</sub> |
|-----------------------------------|------------------------|----------------|------------------|--------------|---------|--------------------|--------------------|------------------|
|                                   | 15                     | <1             | 24               | 7.77 to 8.20 | 4       | 7.75 <sup>£</sup>  | -0.15 <sup>£</sup> | N/A              |
|                                   | 16                     | <1             | 26               | 7.88 to 8.20 | 4       | 7.36 <sup>£</sup>  | -0.71 <sup>£</sup> | N/A              |
| <i>Hemicentrotus pulcherrimus</i> | 13                     | <1             | 14               | 7.02 to 7.98 | 5       | 7.78 <sup>£</sup>  | -0.19 <sup>£</sup> | N/A              |
| <i>Odontaster validus</i>         | 272                    | <1             | -0.5             | 7.00 to 8.10 | 4       | Not fit found      |                    | N/A              |
|                                   | 273                    | <1             | -0.5             | 7.00 to 8.10 | 4       | Not fit found      |                    | N/A              |
|                                   | 274                    | <1             | -0.5             | 7.00 to 8.10 | 4       | -7.54 <sup>£</sup> | -2.34 <sup>£</sup> | N/A              |
|                                   | 275                    | <1             | -0.5             | 7.00 to 8.10 | 4       | -7.54 <sup>£</sup> | -2.34 <sup>£</sup> | N/A              |
|                                   | 276                    | 58             | -0.5             | 7.00 to 8.10 | 4       | -7.54 <sup>£</sup> | -2.34 <sup>£</sup> | N/A              |
| <i>Ophiothrix fragilis</i>        | 49                     | 6              | 14               | 7.70 to 8.10 | 3       | 7.58 <sup>£</sup>  | -0.24 <sup>£</sup> | N/A              |
|                                   | 50                     | 6              | 14               | 7.7 to 8.10  | 3       | 7.61 <sup>£</sup>  | -0.32 <sup>£</sup> | N/A              |
| <i>Paracentrotus lividus</i>      | 300                    | <1             | 14               | 6.80 to 8.00 | 4       | -7.54 <sup>£</sup> | -2.34 <sup>£</sup> | N/A              |
|                                   | 301                    | <1             | 14               | 6.80 to 8.00 | 4       | -7.54 <sup>£</sup> | -2.34 <sup>£</sup> | N/A              |
|                                   | 302                    | <1             | 14               | 6.80 to 8.00 | 4       | 7.14 <sup>£</sup>  | -0.04 <sup>£</sup> | N/A              |
|                                   | 303                    | <1             | 14               | 6.80 to 8.00 | 4       | -7.54 <sup>£</sup> | -2.34 <sup>£</sup> | N/A              |
|                                   | 304                    | <1             | 14               | 6.80 to 8.00 | 4       | -7.54 <sup>£</sup> | -2.34 <sup>£</sup> | N/A              |
|                                   | 305                    | <1             | 14               | 6.80 to 8.00 | 4       | 6.92 <sup>£</sup>  | -1.33 <sup>£</sup> | N/A              |



| Logistic regression ID | Duration (day) | Temperature (°C) | pH range     | Samples | pH <sub>50</sub>                                         | $\beta$                                         | pH <sub>10</sub> |
|------------------------|----------------|------------------|--------------|---------|----------------------------------------------------------|-------------------------------------------------|------------------|
|                        |                |                  | 8.00         |         |                                                          |                                                 |                  |
| 306                    | <1             | 14               | 6.80 to 8.00 | 4       | Not fit found                                            |                                                 | N/A              |
| 307                    | <1             | 14               | 6.80 to 8.00 | 4       | 4.20 <sup>£</sup><br>7.52<br>(7.42 to 7.61) <sup>£</sup> | -1.8 <sup>£</sup><br>-0.18<br>(-0.31 to -0.06)  | N/A              |
| 308                    | <1             | 14               | 6.80 to 8.00 | 4       | 6.32<br>(5.88 to 6.75) <sup>£</sup>                      | -0.69<br>(-1.00 to -0.38)                       | 7.69             |
| 309                    | <1             | 14               | 6.80 to 8.00 | 4       | 6.06<br>(5.25 to 6.88) <sup>£</sup>                      | -0.91<br>(-1.50 to -0.32)                       | 6.98             |
| 310                    | <1             | 14               | 6.80 to 8.00 | 4       | 7.50<br>(7.49 to 7.51) <sup>£</sup>                      | -0.18<br>(-0.18 to -0.17)                       | 6.93             |
| 311                    | <1             | 14               | 6.80 to 8.00 | 4       | 7.51 <sup>£</sup>                                        | 0.17)                                           | 7.67             |
| 312                    | <1             | 14               | 6.80 to 8.00 | 4       | 4.74 <sup>£</sup><br>7.61<br>(7.60 to 7.62) <sup>£</sup> | -2.25 <sup>£</sup><br>-0.11<br>(-0.12 to -0.10) | N/A              |
| 313                    | <1             | 14               | 6.80 to 8.00 | 4       | 7.62 <sup>£</sup>                                        | 0.10)                                           | 7.72             |
| 314                    | <1             | 14               | 6.80 to 8.00 | 4       | 7.71 <sup>£</sup>                                        | -0.09 <sup>£</sup>                              | N/A              |
| 315                    | <1             | 14               | 6.80 to 8.00 | 4       | 8.03 <sup>£</sup><br>7.95<br>(7.88 to 8.02) <sup>£</sup> | -0.01 <sup>£</sup><br>-0.17<br>(-0.31 to -0.03) | N/A              |
| 316                    | <1             | 14               | 6.80 to 8.00 | 4       | 8.02 <sup>£</sup>                                        | 0.03)                                           | 8.11             |
| 317                    | <1             | 14               | 6.80 to 8.00 | 4       | 7.87 <sup>£</sup>                                        | -0.28 <sup>£</sup>                              | N/A              |

|                                          | Logistic regression ID | Duration (day) | Temperature (°C) | pH range                  | Samples | pH <sub>50</sub>                 | $\beta$               | pH <sub>10</sub> |
|------------------------------------------|------------------------|----------------|------------------|---------------------------|---------|----------------------------------|-----------------------|------------------|
|                                          |                        |                |                  | 8.00                      |         |                                  |                       |                  |
| <i>Strongylocentrotus droebachiensis</i> | 252                    | <1             | 0                | 7.59 to 8.05 <sup>□</sup> | 5       | 7.40 (7.37 to 7.43) <sup>§</sup> | -0.11 (-0.20 to 0.02) | 7.51             |
|                                          | 253                    | <1             | 0                | 7.59 to 8.05 <sup>□</sup> | 5       | 7.85 <sup>£</sup>                | -0.79 <sup>£</sup>    | N/A              |
|                                          | 254                    | <1             | 0                | 7.59 to 8.05 <sup>□</sup> | 5       | 7.69 (7.65 to 7.73) <sup>£</sup> | -0.16 (-0.24 to 0.08) | 7.84             |
|                                          | 255                    | <1             | 0                | 7.59 to 8.05 <sup>□</sup> | 5       | Not fit found                    |                       | N/A              |
| <i>Strongylocentrotus franciscanus</i>   | 186                    | <1             | 9                | 7.47 to 8.04              | 3       | 7.13 (6.99 to 7.27) <sup>§</sup> | -0.37 (-0.54 to 0.21) | 7.49             |
|                                          | 187                    | <1             | 9                | 7.47 to 8.04              | 3       | 7.54 <sup>£</sup>                | -0.15 <sup>£</sup>    | N/A              |
| <i>Tripneustes gratilla</i>              | 288                    | 5              | 24               | 7.60 to 8.15              | 3       | Not fit found                    |                       | N/A              |
|                                          | 289                    | 5              | 27               | 7.60 to 8.15              | 3       | Not fit found                    |                       | N/A              |
|                                          | 290                    | 5              | 30               | 7.60 to 8.15              | 3       | -3.04 <sup>£</sup>               | -4.16 <sup>£</sup>    | N/A              |
| Mollusca                                 |                        |                |                  |                           |         |                                  |                       |                  |
| <i>Crassostrea gigas</i>                 | 106                    | 3              | 18.9             | 7.41 to 8.03              | 4       | 7.35 (7.32 to 7.38) <sup>§</sup> | -0.24 (-0.32 to 0.16) | 7.58             |
|                                          | 117                    | <1             | 20               | 7.68 to 8.00 <sup>□</sup> | 4       | 7.15 (6.85 to 7.45) <sup>£</sup> | -0.35 (-0.70 to 0.01) | 7.48             |
| <i>Haliotis discus hannai</i>            | 118                    | <1             | 20               | 7.68 to 8.00 <sup>□</sup> | 4       | 7.34                             | -0.22                 | 7.55             |

|                               | Logistic regression ID | Duration (day) | Temperature (°C) | pH range                  | Samples | pH <sub>50</sub>            | β                  | pH <sub>10</sub> |
|-------------------------------|------------------------|----------------|------------------|---------------------------|---------|-----------------------------|--------------------|------------------|
|                               |                        |                |                  | 8.00 <sup>□</sup>         |         | (7.33 to 7.35) <sup>ε</sup> | (-0.24 to -0.20)   |                  |
|                               |                        | <1             |                  |                           |         | 7.23                        | -0.32              |                  |
|                               | 119                    |                | 20               | 7.40 to 8.00 <sup>□</sup> | 5       | (7.12 to 7.34) <sup>ε</sup> | (-0.48 to -0.16)   | 7.53             |
|                               |                        | <1             |                  |                           |         | 7.05                        | -0.29              |                  |
|                               | 120                    |                | 20               | 7.40 to 8.00 <sup>□</sup> | 5       | (7.00 to 7.09) <sup>§</sup> | (-0.33 to -0.24)   | 7.32             |
| <i>Haliotis kamtschatkana</i> | 68                     | 8              | 12               | 7.47 to 8.04              | 3       | 6.80 <sup>£</sup>           | -0.50 <sup>£</sup> |                  |

**(c) Survival**

Arthropoda

|                                |     |    |    |                           |   |                             |                    |      |
|--------------------------------|-----|----|----|---------------------------|---|-----------------------------|--------------------|------|
| <i>Acartia erythraea</i>       | 28  | 8  | 27 | 6.91 to 8.15              | 3 | 7.57 <sup>£</sup>           | -0.01 <sup>£</sup> | N/A  |
|                                | 31  | 8  | 27 | 6.82 to 8.09              | 4 | 6.87 <sup>£</sup>           | -1.18 <sup>£</sup> | N/A  |
| <i>Acartia steueri</i>         | 33  | 6  | 27 | 6.93 to 8.16              | 3 | Not fit found               |                    | 7.73 |
|                                |     |    |    |                           |   | 7.60                        | -0.14              |      |
| <i>Amphibalanus improvisus</i> | 165 | 56 | 12 | 7.26 to 8.04 <sup>□</sup> | 3 | (7.57 to 7.63) <sup>¶</sup> | (-0.22 to -0.06)   | 7.73 |
|                                |     |    |    |                           |   | 7.84                        | -0.13              |      |
|                                | 166 | 56 | 20 | 7.32 to 8.11 <sup>□</sup> | 3 | (7.79 to 7.88) <sup>ε</sup> | (-0.20 to -0.05)   | 7.96 |
|                                | 167 | 56 | 27 | 7.44 to 8.18 <sup>□</sup> | 3 | 7.60 <sup>£</sup>           | -0.01 <sup>£</sup> | N/A  |
|                                | 168 | 28 | 12 | 7.26 to 8.04 <sup>□</sup> | 3 | 6.33 <sup>£</sup>           | -0.70 <sup>£</sup> | N/A  |

|                              | Logistic regression ID | Duration (day) | Temperature (°C) | pH range                  | Samples | pH <sub>50</sub>                    | $\beta$                   | pH <sub>10</sub> |
|------------------------------|------------------------|----------------|------------------|---------------------------|---------|-------------------------------------|---------------------------|------------------|
|                              | 169                    | 28             | 20               | 7.32 to 8.11 <sup>□</sup> | 3       | 7.41 <sup>£</sup>                   | -0.33 <sup>£</sup>        | N/A              |
|                              | 170                    | 28             | 27               | 7.44 to 8.18 <sup>□</sup> | 3       | Not fit found                       |                           | N/A              |
| <i>Calanus finmarchicus</i>  | 172                    | 7              | 9.5              | 6.94 to 8.23              | 4       | 6.62 <sup>£</sup>                   | -1.24 <sup>£</sup>        | N/A              |
|                              | 173                    | 7              | 9.5              | 6.94 to 8.23              | 4       | 7.72 <sup>£</sup>                   | -0.01 <sup>£</sup>        | N/A              |
| Cnidaria                     |                        |                |                  |                           |         |                                     |                           |                  |
| <i>Acropora digitifera</i>   | 154                    | 3              | 27               | 7.30 to 8.00              | 3       | 5.91 <sup>£</sup>                   | -0.09 <sup>£</sup>        | N/A              |
|                              | 155                    | 7              | 27               | 7.30 to 8.00              | 3       | 7.66<br>(7.62 to 7.71) <sup>¶</sup> | -0.09<br>(-0.14 to -0.03) | 7.75<br>N/A      |
|                              | 337                    | 7              | 26.8             | 7.30 to 8.00              | 3       | 6.77 <sup>£</sup>                   | -1.04 <sup>£</sup>        | N/A              |
| <i>Acropora tenuis</i>       | 338                    | 7              | 26.8             | 7.30 to 8.00              | 3       | 6.85 <sup>£</sup>                   | -1.10 <sup>£</sup>        | N/A              |
| <i>Balanophyllia elegans</i> | 71                     | 84             | 0                | 7.60 to 8.00              | 3       | 7.56 <sup>£</sup>                   | -0.03 <sup>£</sup>        | N/A              |
|                              | 72                     | 84             | 0                | 7.60 to 8.00              | 3       | No fit found                        |                           | N/A              |
| Echinodermata                |                        |                |                  |                           |         |                                     |                           |                  |
| <i>Evechinus chloroticus</i> | 4                      | 13             | 15               | 6.00 to 8.10              | 6       | 7.86 <sup>£</sup>                   | -0.41 <sup>£</sup>        | N/A              |
| <i>Ophiothrix fragilis</i>   | 51                     | 8              | 14               | 7.70 to 8.10              | 3       | 6.84 <sup>£</sup>                   | -0.45 <sup>£</sup>        | N/A              |
|                              | 52                     | 8              | 14               | 7.70 to 8.10              | 3       | 7.36<br>(7.34 to 7.37) <sup>¶</sup> | -0.04<br>(-0.05 to -0.03) | 7.39             |

|                                             | Logistic regression ID | Duration (day) | Temperature (°C) | pH range     | Samples | pH <sub>50</sub>                    | β                           | pH <sub>10</sub> |
|---------------------------------------------|------------------------|----------------|------------------|--------------|---------|-------------------------------------|-----------------------------|------------------|
| <i>Pseudechinus huttoni</i>                 | 5                      | 9              | 12               | 6.00 to 8.15 | 6       | 7.87 <sup>£</sup>                   | -0.36 <sup>£</sup>          | N/A              |
| <i>Stereochinus neumayeri</i>               | 6                      | 7              | -1.9             | 6.00 to 8.00 | 5       | 7.74 <sup>£</sup>                   | -0.42 <sup>£</sup>          | N/A              |
| <i>Strongylocentrotus droebachiensis</i>    | 87                     | 29             | 9                | 6.97 to 8.01 | 22      | 7.07 <sup>£</sup>                   | -0.48 <sup>£</sup>          | N/A              |
| <i>Tripneustes gratilla</i><br>Foraminifera | 7                      | 4              | 26               | 6.00 to 8.10 | 7       | 7.73 <sup>£</sup>                   | -0.47 <sup>£</sup>          | N/A              |
| <i>Ammonia aomoriensis</i>                  | 277                    | 56             | 8                | 7.27 to 8.10 | 4       | 7.66 <sup>£</sup>                   | -0.20 <sup>£</sup>          | N/A              |
|                                             | 278                    | 56             | 8                | 7.26 to 8.06 | 4       | 1.19 <sup>£</sup>                   | -3.76 <sup>£</sup>          | N/A              |
|                                             | 279                    | 56             | 8                | 7.26 to 8.11 | 4       | Not fit found                       |                             | N/A              |
|                                             | 280                    | 56             | 13               | 7.26 to 8.09 | 4       | 8.06 <sup>£</sup>                   | -0.01 <sup>£</sup>          | N/A              |
|                                             | 281                    | 56             | 13               | 7.25 to 8.05 | 4       | Not fit found                       |                             | N/A              |
|                                             | 282                    | 56             | 13               | 7.27 to 8.07 | 4       | 7.51 <sup>£</sup><br>7.26           | -0.51 <sup>£</sup><br>-0.43 | N/A              |
|                                             | 283                    | 56             | 18               | 7.20 to 8.05 | 4       | (7.22 to 7.30) <sup>£</sup><br>7.04 | (-0.48 to -0.38)            | 7.67             |
|                                             | 284                    | 56             | 18               | 7.25 to 8.10 | 4       | (6.94 to 7.14) <sup>¶</sup>         | (-0.79 to -0.14)            | 7.48             |
| Haptophyta                                  |                        |                |                  |              |         |                                     |                             |                  |
| <i>Emiliania huxleyi</i>                    | 3                      | not clear      | 19               | 7.78 to 8.17 | 4       | Not fit found                       |                             | N/A              |

|                               | Logistic regression ID | Duration (day) | Temperature (°C) | pH range                  | Samples | pH <sub>50</sub>  | $\beta$            | pH <sub>10</sub> |
|-------------------------------|------------------------|----------------|------------------|---------------------------|---------|-------------------|--------------------|------------------|
| Mollusca                      |                        |                |                  |                           |         |                   |                    |                  |
| <i>Argopecten irradians</i>   | 17                     | 19             | 24               | 7.48 to 8.08              | 3       | 7.70 <sup>£</sup> | -0.44 <sup>£</sup> | N/A              |
|                               | 227                    | 20             | 24               | 7.80 to 8.21              | 3       | 7.25 <sup>£</sup> | -0.56 <sup>£</sup> | N/A              |
|                               | 228                    | 20             | 28               | 7.80 to 8.21              | 3       | Not fit found     |                    | N/A              |
| <i>Crassostrea virginica</i>  | 19                     | 20             | 24               | 7.48 to 8.08              | 3       | 7.72 <sup>£</sup> | -0.37 <sup>£</sup> | N/A              |
| <i>Haliotis discus hannai</i> | 121                    | <1             | 20               | 7.68 to 8.00 <sup>□</sup> | 4       | 7.06 <sup>£</sup> | -0.56 <sup>£</sup> | N/A              |
|                               | 122                    | <1             | 20               | 7.40 to 8.00 <sup>□</sup> | 5       | 7.13 <sup>£</sup> | -0.41 <sup>£</sup> | N/A              |
| <i>Haliotis kamtschatkana</i> | 67                     | 8              | 12               | 7.47 to 8.04              | 3       | 7.11 <sup>£</sup> | -0.23 <sup>£</sup> | N/A              |
| <i>Limacina helicina</i>      | 124                    | 29             | 4.25             | 7.66 to 8.28 <sup>□</sup> | 4       | 7.24 <sup>£</sup> | -0.33 <sup>£</sup> | N/A              |
| <i>Mercenaria mercenaria</i>  | 21                     | 15             | 24               | 7.79 to 8.02              | 4       | 7.72 <sup>£</sup> | -0.32 <sup>£</sup> | N/A              |
|                               | 22                     | 18             | 24               | 7.48 to 8.08              | 3       | 7.75 <sup>£</sup> | -0.30 <sup>£</sup> | N/A              |
|                               | 225                    | 20             | 24               | 7.80 to 8.21              | 3       | Not fit found     |                    | N/A              |
|                               | 226                    | 20             | 28               | 7.80 to 8.21              | 3       | 7.51 <sup>£</sup> | -0.27 <sup>£</sup> | N/A              |
| <i>Turbo cornutus</i>         | 318                    | 3              | 0                | 7.41 to 8.02              | 5       | 5.69 <sup>£</sup> | -1.32 <sup>£</sup> | N/A              |
|                               | 319                    | 3              | 0                | 7.52 to 7.98              | 5       | 7.70 <sup>£</sup> | -0.35 <sup>£</sup> | N/A              |
|                               | 320                    | 3              | 0                | 7.40 to                   | 5       | 7.05 <sup>£</sup> | -0.74 <sup>£</sup> | N/A              |

|                                  | Logistic regression ID | Duration (day) | Temperature (°C) | pH range     | Samples | pH <sub>50</sub>                 | $\beta$               | pH <sub>10</sub> |
|----------------------------------|------------------------|----------------|------------------|--------------|---------|----------------------------------|-----------------------|------------------|
|                                  |                        |                |                  | 8.00         |         |                                  |                       |                  |
|                                  | 321                    | 3              | 0                | 7.41 to 8.02 | 5       | 7.11 (6.82 to 7.39) <sup>¶</sup> | -0.57 (-1.11 to 0.03) | 7.65             |
|                                  | 322                    | 3              | 0                | 7.52 to 7.98 | 5       | 7.17 (6.98 to 7.36) <sup>€</sup> | -0.56 (-0.96 to 0.16) | 7.7              |
| Rhodophyta                       |                        |                |                  |              |         |                                  |                       |                  |
| <i>Phymatolithon lenormandii</i> | 256                    | 14             | 18               | 7.55 to 8.00 | 8       | 7.49 <sup>£</sup>                | -0.17 <sup>£</sup>    | N/A              |
| <i>Porolithon onkodes</i>        | 77                     | 56             | 26               | 7.65 to 8.20 | 3       | Not fit found                    |                       | N/A              |
|                                  | 78                     | 56             | 29               | 7.65 to 8.20 | 3       | 7.37 <sup>£</sup>                | -0.03 <sup>£</sup>    | N/A              |
|                                  | 79                     | 56             | 26               | 7.65 to 8.20 | 3       | 7.33 <sup>£</sup>                | -0.05 <sup>£</sup>    | N/A              |
|                                  | 80                     | 56             | 29               | 7.65 to 8.20 | 3       | 7.06 <sup>£</sup>                | -0.44 <sup>£</sup>    | N/A              |
|                                  | 81                     | 56             | 26               | 7.65 to 8.20 | 3       | 6.29 <sup>£</sup>                | -0.90 <sup>£</sup>    | N/A              |
|                                  | 82                     | 56             | 29               | 7.65 to 8.20 | 3       | 7.09 <sup>£</sup>                | -0.51 <sup>£</sup>    | N/A              |
|                                  | 269                    | 3              | 25               | 7.60 to 7.98 | 3       | 7.55 <sup>£</sup>                | -0.50 <sup>£</sup>    | N/A              |

<sup>□</sup> Experiments where pCO<sub>2</sub> was converted to pH (see conversion in appendix S2).

<sup>£</sup> Logistic regression returned pH<sub>50</sub> or  $\beta$  coefficients non-different from zero or p value > 0.05

<sup>€</sup> pH<sub>50</sub> not used in the PAF derivation because a higher pH<sub>50</sub> is available for the same species and life process

<sup>¥</sup> pH<sub>50</sub> used in the derivation of PAF for growth (also illustrated in Figure 1a of the main text)

<sup>§</sup> pH<sub>50</sub> used in the derivation of PAF for reproduction (also illustrated in Figure 1b of the main text)

<sup>¶</sup> pH<sub>50</sub> used in the derivation of PAF for survival (also illustrated in Figure 1c of the main text)

**Table S3.2** Literature list from which the underlying data for logistic regressions were obtained and their reported effect. The ID of each logistic regression is listed in Table S3.1 and the location of each regression is illustrated in Figure S3.1.

| <b>Logistic regression ID</b> | <b>Reference</b>                  | <b>Reported effect</b>                                                               |
|-------------------------------|-----------------------------------|--------------------------------------------------------------------------------------|
| 1                             | Wood et al. <sup>2</sup>          | Egg diameter                                                                         |
| 2,3                           | Iglesias-Rodriguez <sup>3</sup>   | Growth rate and detaching<br>coccolith number                                        |
| 4-7                           | Clark et al. <sup>4</sup>         | Relative mortality                                                                   |
| 8-10                          | Byrne et al. <sup>5</sup>         | Fertilization and gastrulation<br>success                                            |
| 11-14                         | Kurihara et al. <sup>6</sup>      | Hatching and mortality rate,<br>number of eggs, fertilization<br>success, and length |
| 15,16                         | Byrne et al. <sup>7</sup>         | Fertilization and gastrulation<br>success                                            |
| 17-23                         | Talmage & Gobler <sup>8</sup>     | Calcification rate                                                                   |
| 24,25                         | Kurihara & Shirayama <sup>9</sup> | Relative embryo number                                                               |
| 26,27                         | Berge et al. <sup>10</sup>        | Relative growth increase                                                             |
| 28-33                         | Kurihara et al. <sup>11</sup>     | Hatching and mortality rate,<br>number of eggs, fertilization<br>success, and length |
| 34,35                         | Gazeau et al. <sup>12</sup>       | Calcification rate                                                                   |
| 36-48                         | Ries et al. <sup>13</sup>         | Calcification rate                                                                   |
| 49-52                         | Dupont et al. <sup>14</sup>       | Percentile of normal and<br>symetric larvae, body length,<br>and mortality rate      |
| 53-66                         | Anthony et al. <sup>15</sup>      | Relative calcification and<br>productivity rate                                      |
| 67,68                         | Crim et al. <sup>16</sup>         | Percentile of normal larvae and<br>number of larvae                                  |
| 69-72                         | Crook et al. <sup>17</sup>        | Number of larvae and relative<br>mortality of juveniles                              |
| 73,74                         | De Bodt et al. <sup>18</sup>      | Cell density and growth rate                                                         |
| 75,76                         | de Putron et al. <sup>19</sup>    | Weight                                                                               |
| 77-82                         | Diaz-Pulido et al. <sup>20</sup>  | Relative healthy, dead, and pale<br>tissue area                                      |
| 83,84                         | Donohue et al. <sup>21</sup>      | Mineralization                                                                       |
| 85                            | Doo et al. <sup>22</sup>          | Arm length                                                                           |
| 86,87                         | Dorey et al. <sup>23</sup>        | Growth and mortality rate                                                            |
| 88,89                         | Eberlein et al. <sup>24</sup>     | Growth rate and POC<br>production                                                    |
| 90-92                         | Form & Riebesell <sup>25</sup>    | Growth rate and weight                                                               |
| 93                            | Albright & Langdon <sup>26</sup>  | Growth rate                                                                          |



|         |                                      |                                                                                      |
|---------|--------------------------------------|--------------------------------------------------------------------------------------|
| 94-105  | Fujita et al. <sup>27</sup>          | Shell weight<br>Hatching and calcium<br>incorporation rate, shell area<br>and length |
| 106-108 | Gazeau et al. <sup>28</sup>          | Embryo mantle length, embryo<br>and hatching body mass                               |
| 109-112 | Hu et al. <sup>29</sup>              | Hatching rate                                                                        |
| 113-116 | Kawaguchi et al. <sup>30</sup>       | Fertilization success and<br>mortality rate                                          |
| 117-122 | Kimura et al. <sup>31</sup>          | Relative degradation state and<br>mortality rate                                     |
| 123-125 | Lischka et al. <sup>32</sup>         | Growth rate                                                                          |
| 126-130 | Maier et al. <sup>33</sup>           | Fertilization success                                                                |
| 132-135 | Albright et al. <sup>34</sup>        | Size of rods, arms, and width                                                        |
| 136-139 | Martin et al. <sup>35</sup>          | Arm length and total length                                                          |
| 140-147 | Matson et al. <sup>36</sup>          | Mass growth and relative nacre<br>dissolution                                        |
| 148-153 | Melzner et al. <sup>37</sup>         | Survival rate                                                                        |
| 154,155 | Nakamura et al. <sup>38</sup>        | Calcification rate                                                                   |
| 156-164 | Noisette et al. <sup>39</sup>        | Survival rate and larvae success                                                     |
| 165-170 | Pansch et al. <sup>40</sup>          | Hatching and survival rate                                                           |
| 171-173 | Pedersen et al. <sup>41</sup>        | Growth rate and reproductive<br>investment                                           |
| 174-179 | Pistevos et al. <sup>42</sup>        | Cell growth                                                                          |
| 180     | Ragazzola et al. <sup>43</sup>       | Relative biomass increase and<br>relative shell growth                               |
| 181,182 | Appelhans et al. <sup>44</sup>       | Calcite volume and growth rate                                                       |
| 183-185 | Ragazzola et al. <sup>45</sup>       | Time of polyspermy                                                                   |
| 186,187 | Reuter et al. <sup>46</sup>          | Calcification and dissolution<br>rate                                                |
| 188,189 | Rodolfo-Metalpa et al. <sup>47</sup> | Growth rate of juvenile, growth<br>rate and juvenile settling rate                   |
| 190-194 | Saderne & Wahl <sup>48</sup>         | Calcification rate and tissue<br>biomass                                             |
| 195-218 | Schoepf et al. <sup>49</sup>         | Survival rate                                                                        |
| 219-224 | Takahashi & Kurihara <sup>50</sup>   | Larvae growth and length,<br>mortality and survival rate                             |
| 225-232 | Talmage & Gobler <sup>8</sup>        | Growth rate                                                                          |
| 233-235 | Vogel & Uthicke <sup>51</sup>        | Organism diameter and spine<br>length                                                |
| 236-241 | Wolfe K., Dworjanyn S.A., Byrne M.   | Relative weight loss                                                                 |
| 242,243 | Asnagli et al. <sup>52</sup>         | Larval length                                                                        |
| 244-251 | Yu et al. <sup>53</sup>              | Fertilization success and<br>proportion of eggs with hyaline<br>bleb                 |
| 252-255 | Bogner et al. <sup>54</sup>          |                                                                                      |

|         |                                        |                                                     |
|---------|----------------------------------------|-----------------------------------------------------|
| 256     | Bradassi et al. <sup>55</sup>          | Mortality rate                                      |
| 257-268 | Comeau et al. <sup>56</sup>            | Calcification rate                                  |
| 269     | Doropoulos & Diaz-Pulido <sup>57</sup> | Larvae mortality                                    |
| 270,271 | Egilisdottir et al. <sup>58</sup>      | Calcification rate                                  |
|         |                                        | Fertilization success and larvae survival           |
| 272-276 | Gonzalez-Bernat et al. <sup>59</sup>   | Growth rate of larvae                               |
| 277-284 | Haynert & Schönfeld <sup>60</sup>      | Growth rate of juvenile                             |
| 285-287 | Hettinger et al. <sup>61</sup>         | Percentile of normal larvae                         |
| 288-290 | Sheppard Brennan et al. <sup>62</sup>  | Relative calcification and total calcification rate |
|         |                                        | Cell diameter                                       |
| 291-296 | Iguchi et al. <sup>63</sup>            | Calcification rate                                  |
| 297,298 | Lohbeck et al. <sup>64</sup>           | Fertilization success                               |
| 299     | Mingliang et al. <sup>65</sup>         | Embryo and larvae success and shell length          |
| 300-317 | Moullin et al. <sup>66</sup>           | Tissue biomass                                      |
|         |                                        | Calcification rate                                  |
| 318-324 | Onitsuka et al. <sup>67</sup>          | Shell weight                                        |
| 325-336 | Sinutok et al. <sup>68</sup>           | Weight loss                                         |
| 337,338 | Suwa et al. <sup>69</sup>              | Relative calcification rate                         |
| 339,340 | Timmins-Schiffman et al. <sup>70</sup> | CaCO <sub>3</sub> precipitation rate                |
| 341,342 | Wolfe et al. <sup>71</sup>             |                                                     |
| 343,344 | Büdenbender et al. <sup>72</sup>       |                                                     |
| 345,346 | Comeau et al. <sup>73</sup>            |                                                     |

**Figure S3.1** Location of literature studies from which the underlying data for logistic regressions **(a)** growth, **(b)** reproduction, and **(c)** survival were collected. The ID of each logistic regression is listed in Table S3.1. The location of occasional studies was unclear so they are not illustrated in this figure. The logistic regressions for unclear study locations are 28 – 33, 36 – 48, and 69 – 72 (see their corresponding literature in Table S3.2).

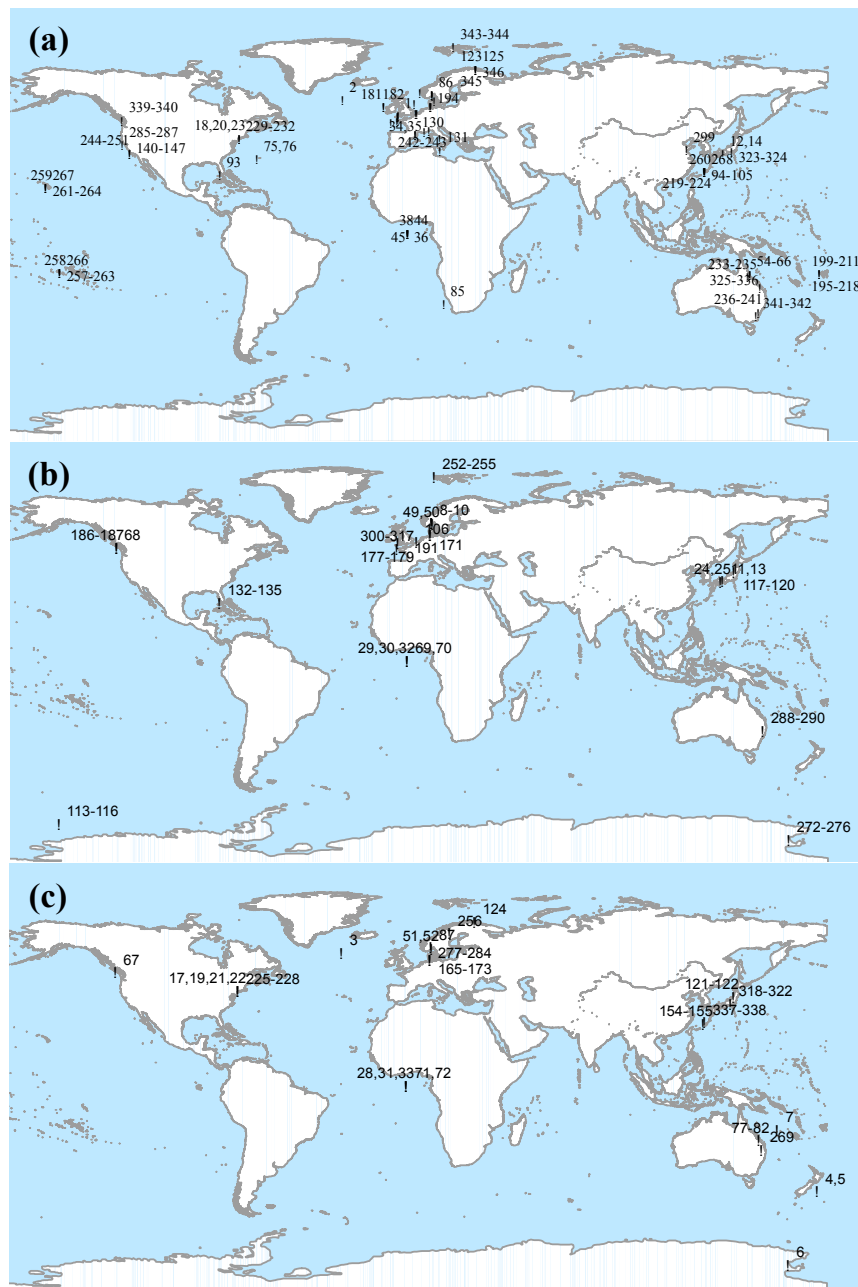

#### Appendix S4 Influence of water temperature and experiment duration

We tested the influence of temperature and experiment duration on pH<sub>50</sub> and pH<sub>10</sub> results employed in the species sensitivity distribution. Results are shown below in Table S4.1.

**Table S4.1** Results of the Pearson correlation (coefficient / p value) between pH<sub>50</sub> and duration and pH<sub>50</sub> and temperature for **(a)** growth, **(b)** reproduction, and **(c)** survival.

|                         | pH <sub>50</sub> | pH <sub>10</sub> |
|-------------------------|------------------|------------------|
| <b>(a) Growth</b>       |                  |                  |
| Duration                | 0.192 / 0.335    | 0.058 / 0.772    |
| Temperature             | 0.020 / 0.583    | 0.229 / 0.240    |
| <b>(b) Reproduction</b> |                  |                  |
| Duration                | -0.031 / 0.928   | -0.507 / 0.111   |
| Temperature             | 0.067 / 0.845    | 0.126 / 0.873    |
| <b>(c) Survival</b>     |                  |                  |
| Duration                | -0.072 / 0.908   | 0.135 / 0.864    |
| Temperature             | 0.521 / 0.368    | 0.080 / 0.814    |

## REFERENCES

1. Feely, R. A.; Doney, S. C.; Cooley, S. R., Ocean acidification: present conditions and future changes in a high-CO<sub>2</sub> world. *Oceanography* **2009**, *22*, (4), 36-47.
2. Wood, H. L.; Spicer, J. I.; Widdicombe, S., Ocean acidification may increase calcification rates, but at a cost. *Proceedings of the Royal Society B: Biological Sciences* **2008**, *275*, (1644), 1767-1773.
3. Iglesias-Rodriguez, M. D.; Halloran, P. R.; Rickaby, R. E. M.; Hall, I. R.; Colmenero-Hidalgo, E.; Gittins, J. R.; Green, D. R. H.; Tyrrell, T.; Gibbs, S. J.; Von Dassow, P.; Rehm, E.; Armbrust, E. V.; Boessenkool, K. P., Phytoplankton calcification in a high-CO<sub>2</sub> world. *Science* **2008**, *320*, (5874), 336-340.
4. Clark, D.; Lamare, M.; Barker, M., Response of sea urchin pluteus larvae (Echinodermata: Echinoidea) to reduced seawater pH: a comparison among a tropical, temperate, and a polar species. *Marine Biology* **2009**, *156*, (6), 1125-1137.
5. Byrne, M.; Soars, N.; Selvakumaraswamy, P.; Dworjanyn, S. A.; Davis, A. R., Sea urchin fertilization in a warm, acidified and high pCO<sub>2</sub> ocean across a range of sperm densities. *Marine Environmental Research* **2010**, *69*, (4), 234-239.
6. Kurihara, H.; Shimode, S.; Shirayama, Y., Sub-lethal effects of elevated concentration of CO<sub>2</sub> on planktonic copepods and sea urchins. *Journal of Oceanography* **2004**, *60*, (4), 743-750.
7. Byrne, M.; Ho, M.; Selvakumaraswamy, P.; Nguyen, H. D.; Dworjanyn, S. A.; Davis, A. R., Temperature, but not pH, compromises sea urchin fertilization and early development under near-future climate change scenarios. *Proceedings of the Royal Society B: Biological Sciences* **2009**.
8. Talmage, S. C.; Gobler, C. J., The effects of elevated carbon dioxide concentrations on the metamorphosis, size, and survival of larval hard clams (*Mercenaria mercenaria*), bay scallops (*Argopecten irradians*), and Eastern oysters (*Crassostrea virginica*). *Limnology and Oceanography* **2009**, *54*, (6), 2072-2080.
9. Kurihara, H.; Shirayama, Y., Effects of increased atmospheric CO<sub>2</sub> and decreased pH on sea urchin embryos and gametes. *Proceedings of the 11th International Echinoderm Conference, 6-10 October 2003, Munich, Germany. Taylor & Francis*. **2004**, 31-36.
10. Berge, J. A.; Bjerkeng, B.; Pettersen, O.; Schaanning, M. T.; Øxnevad, S., Effects of increased sea water concentrations of CO<sub>2</sub> on growth of the bivalve *Mytilus edulis* L. *Chemosphere* **2006**, *62*, (4), 681-687.
11. Kurihara, H.; Shimode, S.; Shirayama, Y., Effects of raised CO<sub>2</sub> concentration on the egg production rate and early development of two marine copepods (*Acartia steueri* and *Acartia erythraea*). *Marine Pollution Bulletin* **2004**, *49*, (9-10), 721-727.
12. Gazeau, F.; Quiblier, C.; Jansen, J. M.; Gattuso, J.-P.; Middelburg, J. J.; Heip, C. H. R., Impact of elevated CO<sub>2</sub> on shellfish calcification. *Geophysical Research Letters* **2007**, *34*, (7).
13. Ries, J. B.; Cohen, A. L.; McCorkle, D. C., Marine calcifiers exhibit mixed responses to CO<sub>2</sub>-induced ocean acidification. *Geology* **2009**, *37*, (12), 1131-1134.
14. Dupont, S.; Havenhand, J.; Thorndyke, W.; Peck, L.; Thorndyke, M., Near-future level of CO<sub>2</sub>-driven ocean acidification radically affects larval survival and development in the brittlestar *Ophiothrix fragilis*. *Marine Ecology Progress Series* **2008**, *373*, 285-294.
15. Anthony, K. R. N.; Kline, D. I.; Diaz-Pulido, G.; Dove, S.; Hoegh-Guldberg, O., Ocean acidification causes bleaching and productivity loss in coral reef builders. *Proceedings of the National Academy of Sciences of the United States of America* **2008**, *105*, (45), 17442-17446.

16. Crim, R. N.; Sunday, J. M.; Harley, C. D. G., Elevated seawater CO<sub>2</sub> concentrations impair larval development and reduce larval survival in endangered northern abalone (*Haliotis kamtschatkana*). *Journal of Experimental Marine Biology and Ecology* **2011**, *400*, (1–2), 272-277.
17. Crook, E. D.; Cooper, H.; Potts, D. C.; Lambert, T.; Paytan, A., Impacts of food availability and pCO<sub>2</sub> on planulation, juvenile survival, and calcification of the azooxanthellate scleractinian coral *Balanophyllia elegans*. *Biogeosciences* **2013**, *10*, (11), 7599-7608.
18. De Bodt, C.; Van Oostende, N.; Harlay, J.; Sabbe, K.; Chou, L., Individual and interacting effects of pCO<sub>2</sub> and temperature on *Emiliana huxleyi* calcification: Study of the calcite production, the coccolith morphology and the coccosphere size. *Biogeosciences* **2010**, *7*, (5), 1401-1412.
19. de Putron, S. J.; McCorkle, D. C.; Cohen, A. L.; Dillon, A. B., The impact of seawater saturation state and bicarbonate ion concentration on calcification by new recruits of two Atlantic corals. *Coral Reefs* **2011**, *30*, (2), 321-328.
20. Diaz-Pulido, G.; Anthony, K. R. N.; Kline, D. I.; Dove, S.; Hoegh-Guldberg, O., Interactions between ocean acidification and warming on the mortality and dissolution of coralline algae. *Journal of Phycology* **2012**, *48*, (1), 32-39.
21. Donohue, P. J. C.; Calosi, P.; Bates, A. H.; Laverock, B.; Rastrick, S.; Mark, F. C.; Strobel, A.; Widdicombe, S., Impact of exposure to elevated pCO<sub>2</sub> on the physiology and Behaviour of an important ecosystem engineer, the burrowing shrimp *Upogebia deltaura*. *Aquatic Biology* **2012**, *15*, (1), 73-86.
22. Doo, S. S.; Dworjanyn, S. A.; Foo, S. A.; Soars, N. A.; Byrne, M., Impacts of ocean acidification on development of the meroplanktonic larval stage of the sea urchin *Centrostephanus rodgersii*. *ICES Journal of Marine Science* **2012**, *69*, (3), 460–464.
23. Dorey, N.; Lançon, P.; Thorndyke, M.; Dupont, S., Assessing physiological tipping point of sea urchin larvae exposed to a broad range of pH. *Global Change Biology* **2013**, *19*, (11), 3355-3367.
24. Eberlein, T.; Van de Waal, D. B.; Rost, B., Differential effects of ocean acidification on carbon acquisition in two bloom-forming dinoflagellate species. *Physiologia Plantarum* **2014**, *151*, (4), 468-479.
25. Form, A. U.; Riebesell, U., Acclimation to ocean acidification during long-term CO<sub>2</sub> exposure in the cold-water coral *Lophelia pertusa*. *Global Change Biology* **2012**, *18*, (3), 843-853.
26. Albright, R.; Langdon, C., Ocean acidification impacts multiple early life history processes of the Caribbean coral *Porites astreoides*. *Global Change Biology* **2011**, *17*, (7), 2478-2487.
27. Fujita, K.; Hikami, M.; Suzuki, A.; Kuroyanagi, A.; Sakai, K.; Kawahata, H.; Nojiri, Y., Effects of ocean acidification on calcification of symbiont-bearing reef foraminifers. *Biogeosciences* **2011**, *8*, (8), 2089-2098.
28. Gazeau, F.; Gattuso, J. P.; Greaves, M.; Elderfield, H.; Peene, J.; Heip, C. H. R.; Middelburg, J. J., Effect of carbonate chemistry alteration on the early embryonic development of the pacific oyster (*Crassostrea gigas*). *PLoS ONE* **2011**, *6*, (8).
29. Hu, M. Y.; Tseng, Y. C.; Stumpp, M.; Gutowska, M. A.; Kiko, R.; Lucassen, M.; Melzner, F., Elevated seawater pCO<sub>2</sub> differentially affects branchial acid-base transporters over the course of development in the cephalopod *Sepia officinalis*. *American Journal of Physiology - Regulatory Integrative and Comparative Physiology* **2011**, *300*, (5), R1100-R1114.

30. Kawaguchi, S.; Kurihara, H.; King, R.; Hale, L.; Berli, T.; Robinson, J. P.; Ishida, A.; Wakita, M.; Virtue, P.; Nicol, S.; Ishimatsu, A., Will krill fare well under Southern Ocean acidification? *Biology Letters* **2011**, *7*, (2), 288-291.
31. Kimura, R. Y. O.; Takami, H.; Ono, T.; Onitsuka, T.; Nojiri, Y., Effects of elevated pCO<sub>2</sub> on the early development of the commercially important gastropod, Ezo abalone *Haliotis discus hannai*. *Fisheries Oceanography* **2011**, *20*, (5), 357-366.
32. Lischka, S.; Büdenbender, J.; Boxhammer, T.; Riebesell, U., Impact of ocean acidification and elevated temperatures on early juveniles of the polar shelled pteropod *Limacina helicina*: Mortality, shell degradation, and shell growth. *Biogeosciences* **2011**, *8*, (4), 919-932.
33. Maier, C.; Schubert, A.; Berzunza Sánchez, M. M.; Weinbauer, M. G.; Watremez, P.; Gattuso, J. P., End of the Century pCO<sub>2</sub> Levels Do Not Impact Calcification in Mediterranean Cold-Water Corals. *PLoS ONE* **2013**, *8*, (4).
34. Albright, R.; Mason, B.; Miller, M.; Langdon, C., Ocean acidification compromises recruitment success of the threatened Caribbean coral *Acropora palmata*. *Proceedings of the National Academy of Sciences of the United States of America* **2010**, *107*, (47), 20400-20404.
35. Martin, S.; Richier, S.; Pedrotti, M. L.; Dupont, S.; Castejon, C.; Gerakis, Y.; Kerros, M. E.; Oberhänsli, F.; Teysse, J. L.; Jeffree, R.; Gattuso, J. P., Early development and molecular plasticity in the Mediterranean sea urchin *Paracentrotus lividus* exposed to CO<sub>2</sub>-driven acidification. *Journal of Experimental Biology* **2011**, *214*, (8), 1357-1368.
36. Matson, P. G.; Yu, P. C.; Sewell, M. A.; Hofmann, G. E., Development under elevated pCO<sub>2</sub> conditions does not affect lipid utilization and protein content in early life-history stages of the purple sea urchin, *Strongylocentrotus purpuratus*. *Biological Bulletin* **2012**, *223*, (3), 312-327.
37. Melzner, F.; Stange, P.; Trübenbach, K.; Thomsen, J.; Casties, I.; Panknin, U.; Gorb, S. N.; Gutowska, M. A., Food supply and seawater pCO<sub>2</sub> impact calcification and internal shell dissolution in the blue mussel *Mytilus edulis*. *PLoS ONE* **2011**, *6*, (9).
38. Nakamura, M.; Ohki, S.; Suzuki, A.; Sakai, K., Coral larvae under ocean acidification: Survival, metabolism, and metamorphosis. *PLoS ONE* **2011**, *6*, (1).
39. Noisette, F.; Duong, G.; Six, C.; Davoult, D.; Martin, S., Effects of elevated pCO<sub>2</sub> on the metabolism of a temperate rhodolith Lithothamnion corallioides grown under different temperatures. *Journal of Phycology* **2013**, *49*, (4), 746-757.
40. Pansch, C.; Nasrolahi, A.; Appelhans, Y. S.; Wahl, M., Impacts of ocean warming and acidification on the larval development of the barnacle *Amphibalanus improvisus*. *Journal of Experimental Marine Biology and Ecology* **2012**, *420-421*, 48-55.
41. Pedersen, S. A.; Våge, V. T.; Olsen, A. J.; Hammer, K. M.; Altin, D., Effects of elevated carbon dioxide (CO<sub>2</sub>) concentrations on early developmental stages of the marine copepod *Calanus finmarchicus gunnerus* (Copepoda: Calanoidae). *Journal of Toxicology and Environmental Health - Part A: Current Issues* **2014**, *77*, (9-11), 535-549.
42. Pistevidos, J. C. A.; Calosi, P.; Widdicombe, S.; Bishop, J. D. D., Will variation among genetic individuals influence species responses to global climate change? *Oikos* **2011**, *120*, (5), 675-689.
43. Ragazzola, F.; Foster, L. C.; Form, A.; Anderson, P. S.; Hansteen, T. H.; Fietzke, J., Ocean acidification weakens the structural integrity of coralline algae. *Global Change Biology* **2012**, *18*, (9), 2804-2812.

44. Appelhans, Y. S.; Thomsen, J.; Pansch, C.; Melzner, F.; Wahl, M., Sour times: Seawater acidification effects on growth, feeding behaviour and acid-base status of *Asterias rubens* and *Carcinus maenas*. *Marine Ecology Progress Series* **2012**, *459*, 85-97.
45. Ragazzola, F.; Foster, L. C.; Form, A. U.; Büscher, J.; Hansteen, T. H.; Fietzke, J., Phenotypic plasticity of coralline algae in a High CO<sub>2</sub> world. *Ecology and Evolution* **2013**, *3*, (10), 3436-3446.
46. Reuter, K. E.; Lotterhos, K. E.; Crim, R. N.; Thompson, C. A.; Harley, C. D. G., Elevated pCO<sub>2</sub> increases sperm limitation and risk of polyspermy in the red sea urchin *Strongylocentrotus franciscanus*. *Global Change Biology* **2011**, *17*, (1), 163-171.
47. Rodolfo-Metalpa, R.; Lombardi, C.; Cocito, S.; Hall-Spencer, J. M.; Gambi, M. C., Effects of ocean acidification and high temperatures on the bryozoan *Myriapora truncata* at natural CO<sub>2</sub> vents. *Marine Ecology* **2010**, *31*, (3), 447-456.
48. Saderne, V.; Wahl, M., Differential Responses of Calcifying and Non-Calcifying Epibionts of a Brown Macroalga to Present-Day and Future Upwelling pCO<sub>2</sub>. *PLoS ONE* **2013**, *8*, (7).
49. Schoepf, V.; Grottoli, A. G.; Warner, M. E.; Cai, W. J.; Melman, T. F.; Hoadley, K. D.; Pettay, D. T.; Hu, X.; Li, Q.; Xu, H.; Wang, Y.; Matsui, Y.; Baumann, J. H., Coral Energy Reserves and Calcification in a High-CO<sub>2</sub> World at Two Temperatures. *PLoS ONE* **2013**, *8*, (10).
50. Takahashi, A.; Kurihara, H., Ocean acidification does not affect the physiology of the tropical coral *Acropora digitifera* during a 5-week experiment. *Coral Reefs* **2013**, *32*, (1), 305-314.
51. Vogel, N.; Uthicke, S., Calcification and photobiology in symbiont-bearing benthic foraminifera and responses to a high CO<sub>2</sub> environment. *Journal of Experimental Marine Biology and Ecology* **2012**, *424-425*, 15-24.
52. Asnaghi, V.; Chiantore, M.; Mangialajo, L.; Gazeau, F.; Francour, P.; Alliouane, S.; Gattuso, J. P., Cascading Effects of Ocean Acidification in a Rocky Subtidal Community. *PLoS ONE* **2013**, *8*, (4).
53. Yu, P. C.; Matson, P. G.; Martz, T. R.; Hofmann, G. E., The ocean acidification seascape and its relationship to the performance of calcifying marine invertebrates: Laboratory experiments on the development of urchin larvae framed by environmentally-relevant pCO<sub>2</sub>/pH. *Journal of Experimental Marine Biology and Ecology* **2011**, *400*, (1-2), 288-295.
54. Bögner, D.; Bickmeyer, U.; Köhler, A., CO<sub>2</sub>-induced fertilization impairment in *Strongylocentrotus droebachiensis* collected in the Arctic. *Helgoland Marine Research* **2014**, *68*, (2), 341-356.
55. Bradassi, F.; Cumani, F.; Bressan, G.; Dupont, S., Early reproductive stages in the crustose coralline alga *Phymatolithon lenormandii* are strongly affected by mild ocean acidification. *Marine Biology* **2013**, *160*, (8), 2261-2269.
56. Comeau, S.; Carpenter, R. C.; Nojiri, Y.; Putnam, H. M.; Sakai, K.; Edmunds, P. J., Pacific-wide contrast highlights resistance of reef calcifiers to ocean acidification. *Proceedings of the Royal Society B: Biological Sciences* **2014**, *281*, (1790).
57. Doropoulos, C.; Diaz-Pulido, G., High CO<sub>2</sub> reduces the settlement of a spawning coral on three common species of crustose coralline algae. *Marine Ecology Progress Series* **2013**, *475*, 93-99.
58. Egilsdottir, H.; Noisette, F.; Noël, L. M. L. J.; Olafsson, J.; Martin, S., Effects of pCO<sub>2</sub> on physiology and skeletal mineralogy in a tidal pool coralline alga *Corallina elongata*. *Marine Biology* **2013**, *160*, (8), 2103-2112.



59. Gonzalez-Bernat, M. J.; Lamare, M.; Barker, M., Effects of reduced seawater pH on fertilisation, embryogenesis and larval development in the Antarctic seastar *Odontaster validus*. *Polar Biology* **2013**, *36*, (2), 235-247.
60. Haynert, K.; Schönfeld, J., Impact of changing carbonate chemistry, temperature, and salinity on growth and test degradation of the benthic foraminifer *Ammonia aomoriensis*. *Journal of Foraminiferal Research* **2014**, *44*, (2), 76-89.
61. Hettinger, A.; Sanford, E.; Hill, T. M.; Russell, A. D.; Sato, K. N. S.; Hoey, J.; Forsch, M.; Page, H. N.; Gaylord, B., Persistent carry-over effects of planktonic exposure to ocean acidification in the Olympia oyster. *Ecology* **2012**, *93*, (12), 2758-2768.
62. Sheppard Brennan, H.; Soars, N.; Dworjanyn, S. A.; Davis, A. R.; Byrne, M., Impact of ocean warming and ocean acidification on larval development and calcification in the sea urchin *Tripneustes gratilla*. *PLoS ONE* **2010**, *5*, (6).
63. Iguchi, A.; Ozaki, S.; Nakamura, T.; Inoue, M.; Tanaka, Y.; Suzuki, A.; Kawahata, H.; Sakai, K., Effects of acidified seawater on coral calcification and symbiotic algae on the massive coral *Porites australiensis*. *Marine Environmental Research* **2012**, *73*, 32-36.
64. Lohbeck, K. T.; Riebesell, U.; Reusch, T. B. H., Adaptive evolution of a key phytoplankton species to ocean acidification. *Nature Geoscience* **2012**, *5*, (5), 346-351.
65. Mingliang, Z.; Jianguang, F.; Jihong, Z.; Bin, L.; Shengmin, R.; Yuze, M.; Yaping, G., Effect of marine acidification on calcification and respiration of *Chlamys farreri*. *Journal of Shellfish Research* **2011**, *30*, (2), 267-271.
66. Moulin, L.; Catarino, A. I.; Claessens, T.; Dubois, P., Effects of seawater acidification on early development of the intertidal sea urchin *Paracentrotus lividus* (Lamarck 1816). *Marine Pollution Bulletin* **2011**, *62*, (1), 48-54.
67. Onitsuka, T.; Kimura, R.; Ono, T.; Takami, H.; Nojiri, Y., Effects of ocean acidification on the early developmental stages of the horned turban, *Turbo cornutus*. *Marine Biology* **2014**, *161*, (5), 1127-1138.
68. Sinutok, S.; Hill, R.; Doblin, M. A.; Wuhler, R.; Ralph, P. J., Warmer more acidic conditions cause decreased productivity and calcification in subtropical coral reef sediment-dwelling calcifiers. *Limnology and Oceanography* **2011**, *56*, (4), 1200-1212.
69. Suwa, R.; Nakamura, M.; Morita, M.; Shimada, K.; Iguchi, A.; Sakai, K.; Suzuki, A., Effects of acidified seawater on early life stages of scleractinian corals (Genus *Acropora*). *Fish Sci* **2010**, *76*, (1), 93-99.
70. Timmins-Schiffman, E.; O'Donnell, M. J.; Friedman, C. S.; Roberts, S. B., Elevated pCO<sub>2</sub> causes developmental delay in early larval Pacific oysters, *Crassostrea gigas*. *Marine Biology* **2013**, *160*, (8), 1973-1982.
71. Wolfe, K.; Smith, A. M.; Trimby, P.; Byrne, M., Vulnerability of the paper nautilus (*Argonauta nodosa*) shell to a climate-change ocean: Potential for extinction by dissolution. *Biological Bulletin* **2012**, *223*, (2), 236-244.
72. Büdenbender, J.; Riebesell, U.; Form, A., Calcification of the Arctic coralline red algae *Lithothamnion glaciale* in response to elevated CO<sub>2</sub>. *Marine Ecology Progress Series* **2011**, *441*, 79-87.
73. Comeau, S.; Jeffree, R.; Teyssié, J. L.; Gattuso, J. P., Response of the arctic pteropod *Limacina helicina* to projected future environmental conditions. *PLoS ONE* **2010**, *5*, (6).
